1 **Title: SARS-CoV-2-specific CD4<sup>+</sup> and CD8<sup>+</sup> T cell responses can originate from cross-**  
2 **reactive CMV-specific T cells**

3 **Authors:** Cilia R Pothast<sup>1\*</sup>, Romy C Dijkland<sup>1</sup>, Melissa Thaler<sup>3</sup>, Renate S Hagedoorn<sup>1</sup>, Michel  
4 GD Kester<sup>1</sup>, Anne K Wouters<sup>1</sup>, Pieter S Hiemstra<sup>2</sup>, Martijn J van Hemert<sup>3</sup>, Stephanie Gras<sup>4,5</sup>, JH  
5 Frederik Falkenburg<sup>1</sup>, Mirjam HM Heemskerk<sup>1\*</sup>

6 **Affiliations:**

7 <sup>1</sup> Department of Hematology; Leiden University Medical Center, Leiden, The Netherlands

8 <sup>2</sup> Department of Pulmonology; Leiden University Medical Center, Leiden, The Netherlands

9 <sup>3</sup> Department of Medical Microbiology; Leiden University Medical Center, Leiden, The  
10 Netherlands

11 <sup>4</sup> Department of Biochemistry and Chemistry, La Trobe Institute for Molecular Science, La Trobe  
12 University, Melbourne, Victoria, Australia

13 <sup>5</sup> Department of Biochemistry and Molecular Biology, Monash University, Clayton, Victoria,  
14 Australia

15 **\*Correspondence:**

16 Cilia R. Pothast and Mirjam H.M. Heemskerk

17 Department of Hematology

18 Leiden University Medical Center

19 Albinusdreef 2, 2333 ZA Leiden

20 The Netherlands

21 +31-(0)71-625-63207

22 [c.r.pothast@lumc.nl](mailto:c.r.pothast@lumc.nl) and [m.h.m.heemskerk@lumc.nl](mailto:m.h.m.heemskerk@lumc.nl)

23

24 The authors have declared that no conflict of interest exists.

25

26 **Abstract**

27 Detection of SARS-coronavirus-2 (SARS-CoV-2) specific CD4<sup>+</sup> and CD8<sup>+</sup> T cells in SARS-CoV-  
28 2-unexposed donors has been explained by the presence of T cells primed by other  
29 coronaviruses. However, based on the relative high frequency and prevalence of cross-reactive  
30 T cells, we hypothesized CMV may induce these cross-reactive T cells. Stimulation of pre-  
31 pandemic cryo-preserved PBMCs with SARS-CoV-2 peptides revealed that frequencies of  
32 SARS-CoV-2-specific T cells were higher in CMV-seropositive donors. Characterization of these  
33 T cells demonstrated that membrane-specific CD4<sup>+</sup> and spike-specific CD8<sup>+</sup> T cells originate from  
34 cross-reactive CMV-specific T cells. Spike-specific CD8<sup>+</sup> T cells recognize SARS-CoV-2 spike  
35 peptide FVSNQTHWF (FVS) and dissimilar CMV pp65 peptide IPSINVHHY (IPS) presented by  
36 HLA-B\*35:01. These dual IPS/FVS-reactive CD8<sup>+</sup> T cells were found in multiple donors as well  
37 as severe COVID-19 patients and shared a common T cell receptor (TCR), illustrating that  
38 IPS/FVS-cross-reactivity is caused by a public TCR. In conclusion, CMV-specific T cells cross-  
39 react with SARS-CoV-2, despite low sequence homology between the two viruses, and may  
40 contribute to the pre-existing immunity against SARS-CoV-2.

41

## 42 **Main text**

### 43 Introduction

44 The effectiveness of the innate and adaptive immune system is an important factor for disease  
45 outcome during infection with severe acute respiratory syndrome coronavirus 2 (SARS-CoV-2)  
46 (Brodin, 2021). CD4<sup>+</sup> and CD8<sup>+</sup> T cells are important components of the adaptive immune system  
47 as CD4<sup>+</sup> T cells promote antibody production by B cells and help cytotoxic CD8<sup>+</sup> T cells to  
48 mediate cytotoxic lysis of SARS-CoV-2 infected cells (Sette & Crotty, 2021). Whilst immunity is  
49 commonly measured solely based on antibody titers, research into coronavirus disease (COVID-  
50 19) pathophysiology and vaccination effectiveness has associated an effective T cell response  
51 with less severe COVID-19 (Bange et al., 2021; Bertoletti et al., 2021; Liao et al., 2020;  
52 Rydzynski Moderbacher et al., 2020; Sekine et al., 2020; Sette & Crotty, 2021; A. T. Tan et al.,  
53 2021). Additionally, SARS-CoV-2-specific T cell responses have been shown to be present in  
54 most individuals 6 months after infection or vaccination and remain largely unaffected by  
55 emerging variants of concern, illustrating their importance in generating durable immune  
56 responses (Chiappesi et al., 2022; Choi et al., 2022; Gao et al., 2022; GeurtsvanKessel et al.,  
57 2022; Jung et al., 2022; Keeton et al., 2022; Liu et al., 2022; Redd et al., 2022; Tarke et al.,  
58 2022).

59 Besides *de novo* SARS-CoV-2-specific T cell responses in infected individuals, SARS-CoV-2-  
60 specific T cells have also been identified in unexposed individuals (Grifoni et al., 2020; Le Bert et  
61 al., 2020; Mateus et al., 2020; Nelde et al., 2021; Weiskopf et al., 2020). This finding indicates  
62 that T cells which were initially primed against other pathogens are able to cross-recognize  
63 SARS-CoV-2 antigen. This phenomenon is called heterologous immunity and can often be  
64 explained by genomic sequence homology between pathogens. Highly homologous DNA  
65 sequences are translated into similar proteins which can be processed and presented as  
66 epitopes with high sequence similarity in human leukocyte antigen (HLA). For this reason, most  
67 research has focused on cross-reactive T cells that are potentially primed by other human  
68 coronaviruses (HCoVs) since they share around 30% amino acid sequence homology with  
69 SARS-CoV-2 (Bacher et al., 2020; Braun et al., 2020; Johansson et al., 2021; Kundu et al., 2022;

70 Le Bert et al., 2020; Loyal et al., 2021; Mateus et al., 2020). However, it has been postulated that  
71 SARS-CoV-2-specific T cells in unexposed individuals could also conceivably be primed by  
72 other, non-HCoVs (Le Bert et al., 2020; Peng et al., 2020; Stervbo et al., 2020; C. C. S. Tan et  
73 al., 2021). Furthermore, previous studies, although limited, have demonstrated the occurrence of  
74 cross-reactivity between two epitopes with relatively low sequence homology (Bijen et al., 2018;  
75 Cameron et al., 2013; Clute et al., 2005; Cornberg et al., 2010; Riley et al., 2018; Su & Davis,  
76 2013). This form of heterologous immunity is poorly understood and, therefore, predicting such  
77 cross-reactivity remains a challenge (Lee et al., 2020).

78 Pre-pandemic SARS-CoV-2-specific T cells are reportedly present in a relatively high proportion  
79 of the population, independent of geographical location, indicating that a highly prevalent  
80 pathogen could be the initial trigger of these cross-reactive T cells (Braun et al., 2020; Grifoni et  
81 al., 2020; Le Bert et al., 2020; Mateus et al., 2020; Meckiff et al., 2020; Nelde et al., 2021; Sekine  
82 et al., 2020; Weiskopf et al., 2020). Furthermore, these cross-reactive T cells should be present  
83 in relatively high frequencies, as they are detectable in antigen-induced stimulation assays  
84 without additional amplification steps (Braun et al., 2020; Grifoni et al., 2020; Le Bert et al., 2020;  
85 Sekine et al., 2020; Weiskopf et al., 2020). Cytomegalovirus (CMV) is a highly prevalent  
86 pathogen and usually induces high T cell frequencies, making CMV a potential trigger for cross-  
87 reactive SARS-CoV-2-specific T cells (Sylwester et al., 2005; Zuhair et al., 2019). This is  
88 supported by the finding that SARS-CoV-2 cross-reactive CD8<sup>+</sup> T cells were increased in CMV-  
89 seropositive (CMV<sup>+</sup>) donors, and that previous CMV infection has been associated with severe  
90 COVID-19 (Alanio et al., 2022; Jo et al., 2021; Weber et al., 2022). Studies so far indicate that  
91 cross-reactive T cells can play a role in COVID-19 immunity but whether they are protective or  
92 pathogenic is unclear (Bacher et al., 2020; Kundu et al., 2022). Taken together, we hypothesized  
93 that cross-reactive SARS-CoV-2-specific T cells might originate from the CMV-specific memory  
94 population.

95 In the present study, we aimed to identify SARS-CoV-2-specific cross-reactive CD4<sup>+</sup> and CD8<sup>+</sup> T  
96 cells in SARS-CoV-2-unexposed individuals. We found an increased presence of cross-reactive  
97 T cells in CMV<sup>+</sup> donors and upon isolation and clonal expansion of the spike-reactive CD8<sup>+</sup> and

98 membrane-reactive CD4<sup>+</sup> T cells we confirmed that these T cells were reactive against both  
99 SARS-CoV-2 and CMV. Interestingly, isolated CD8<sup>+</sup> T cells recognizing a previously described  
100 CMV epitope IPSINVHHY presented by HLA-B\*35:01 were cross-reactive with dissimilar SARS-  
101 CoV-2 spike peptide FVSNQTHWF presented by HLA-B\*35:01, demonstrating that cross-  
102 reactivity does not solely depend on peptide sequence homology. The T cell receptor (TCR)  
103 isolated from these CD8<sup>+</sup> T cells was found in multiple donors showing that pre-pandemic spike-  
104 reactive CD8<sup>+</sup> T cells can be caused by a public CMV-specific TCR. Based on the reduced  
105 activation status compared to other SARS-CoV-2 specific T cells in severe COVID-19 patients,  
106 we hypothesize that these cross-reactive T cells are not important for clearing the virus at this  
107 late stage of the disease. However, these cross-reactive CD8<sup>+</sup> T cells were shown to reduce  
108 spreading of SARS-CoV-2 infection *in vitro*, and in 2 out of 2 CMV<sup>+</sup> severe COVID-19 patients  
109 these cross-reactive T cells were detected. This indicates that early in infection at the stage that  
110 no SARS-CoV-2 specific T cells are present yet, these cross-reactive T cells may play a role in  
111 preventing SARS-CoV-2 infection or reducing the severity of COVID-19.

112

113

114

115 Results

116 **SARS-CoV-2-specific T cell responses in SARS-CoV-2-unexposed PBMCs correlate with**  
117 **CMV seropositivity**

118 To investigate whether SARS-CoV-2-specific CD4<sup>+</sup> and CD8<sup>+</sup> T cell responses in SARS-CoV-2-  
119 unexposed donors correlate with previous CMV infection, pre-pandemic cryopreserved PBMCs  
120 from CMV seropositive (CMV<sup>+</sup>, N=28) and CMV seronegative (CMV<sup>-</sup>, N=39) healthy individuals  
121 were stimulated overnight using SARS-CoV-2 15-mer peptide pools. These pools included 3  
122 spike peptide pools that together overlap the entire spike gene (S, S1 and S+), membrane (M)  
123 and nucleocapsid (N) antigens from SARS-CoV-2. To confirm that CMV<sup>+</sup> individuals have CMV-  
124 specific T cells, reactivity against the most immunogenic CMV antigen, pp65, was also tested.  
125 Memory SARS-CoV-2-specific CD4<sup>+</sup> T cells were characterized as CD154<sup>+</sup>CD137<sup>+</sup> and memory  
126 SARS-CoV-2-specific CD8<sup>+</sup> T cells were identified based on expression of CD137 and IFN- $\gamma$   
127 (**Figure 1A-B** and **Figure 1 – figure supplement 1**). As expected, all CMV<sup>+</sup> donors displayed a  
128 CD4<sup>+</sup> and/or CD8<sup>+</sup> T cell response upon stimulation with pp65 (**Figure 1C-E**). No marked  
129 increase of CD4<sup>+</sup> T cell responses were observed after SARS-CoV-2 spike and nucleocapsid  
130 stimulation in the CMV<sup>+</sup> group compared to CMV<sup>-</sup>. However, 6 donors in the CMV<sup>+</sup> group  
131 displayed a CD4<sup>+</sup> T cell response against the membrane peptide pool which was not observed in  
132 the CMV<sup>-</sup> group (**Figure 1C**). Furthermore, CD4<sup>+</sup> T cell response against the membrane pool  
133 was accompanied by a CD4<sup>+</sup> T cell response against pp65 (**Figure 1D**). In addition, CD8<sup>+</sup> T cell  
134 responses were detected against spike peptides in two CMV<sup>+</sup> donors which were not detected in  
135 CMV<sup>-</sup> donors (**Figure 1E**). Interestingly, donors with a high CD8<sup>+</sup> T cell response against SARS-  
136 CoV-2 spike peptides additionally displayed strong reactivity against pp65 (**Figure 1F**). Taken  
137 together, these results show that SARS-CoV-2-unexposed CMV<sup>+</sup>, but not CMV<sup>-</sup>, individuals had  
138 detectable CD4<sup>+</sup> T cell responses against membrane peptides and CD8<sup>+</sup> T cells targeting spike  
139 peptides. These SARS-CoV-2 responses were accompanied by T cell responses against pp65  
140 and thus may indicate that SARS-CoV-2 T cell responses in pre-pandemic samples potentially  
141 are memory T cells targeting pp65.

142

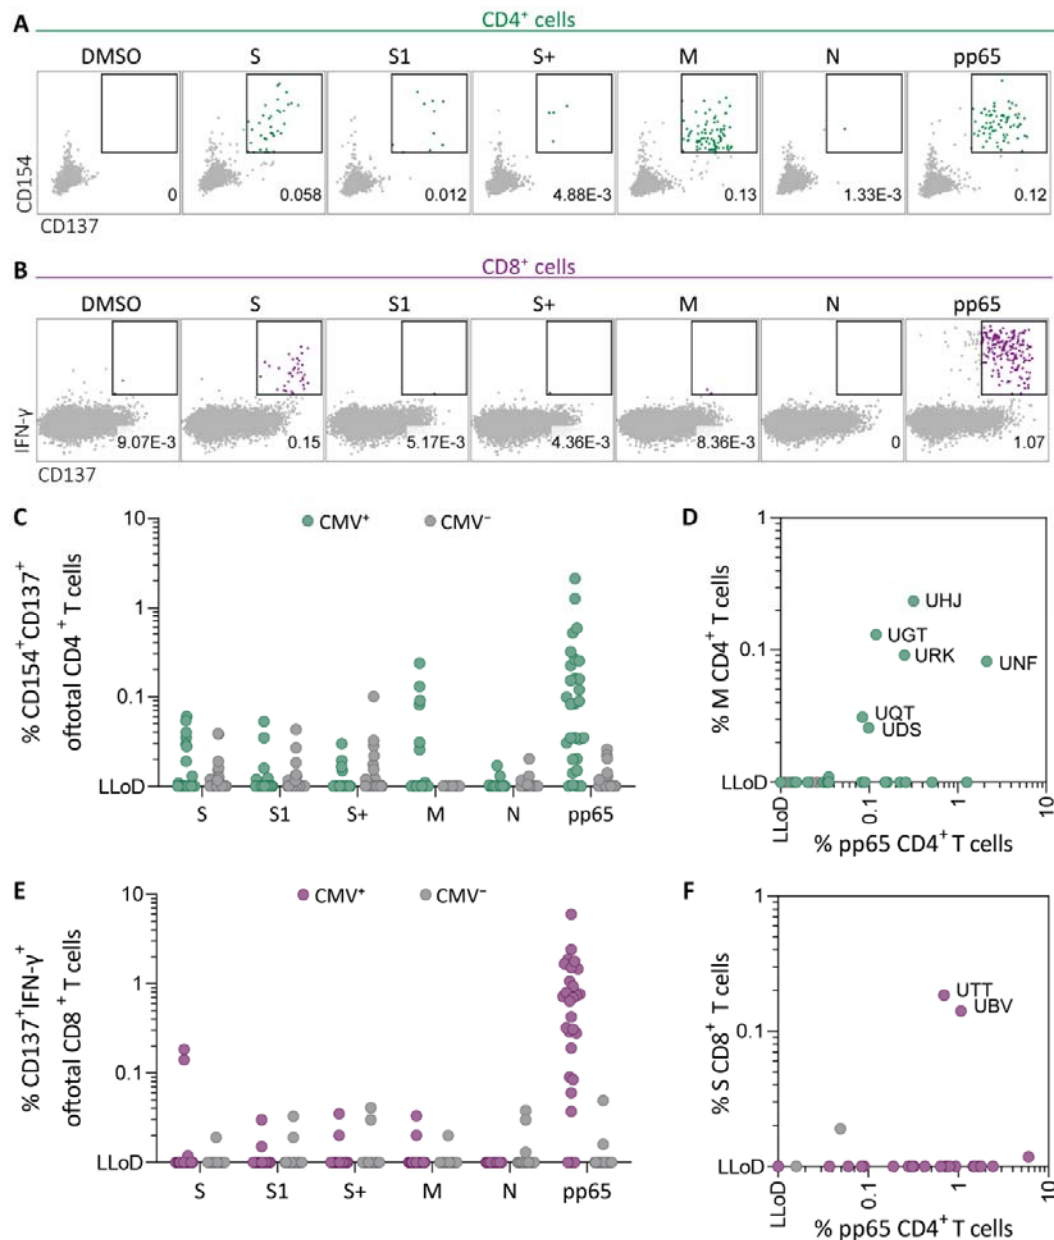

143  
144 **Figure 1** *Ex vivo* SARS-CoV-2-specific CD4<sup>+</sup> and CD8<sup>+</sup> T-cell responses in CMV-positive and –  
145 negative unexposed donors

146 Pre-pandemic cryo-preserved PBMCs were stimulated using SARS-CoV-2 spike (S, S1 and S+),  
147 membrane (M), nucleocapsid (N) and CMV pp65 peptide pools or not stimulated (DMSO). A) A  
148 representative flow cytometry example of a CD4<sup>+</sup> T cell response in a SARS-CoV-2-unexposed  
149 donor. Numbers in plot represent frequencies of CD137<sup>+</sup>CD154<sup>+</sup> cells of total CD4<sup>+</sup> T cells. B) A  
150 representative flow cytometry example of a CD8<sup>+</sup> T cell response in a SARS-CoV-2-unexposed

151 donor. Numbers in plot represent frequencies of CD137<sup>+</sup>IFN- $\gamma$ <sup>+</sup> cells of total CD8<sup>+</sup> T cells. C)  
152 Scatter plot showing frequencies of CD137<sup>+</sup>CD154<sup>+</sup> cells of total CD4<sup>+</sup> T cells of CMV<sup>+</sup> (green,  
153 N=28) and CMV<sup>-</sup> (grey, N=39) donors. D) Frequencies of CD137<sup>+</sup>CD154<sup>+</sup> cells of total CD4<sup>+</sup> T  
154 cells in the membrane-stimulated condition (membrane response) plotted against pp65-  
155 stimulated condition (pp65 response). 3 letter codes are anonymized codes of CMV<sup>+</sup> (green) and  
156 CMV<sup>-</sup> (grey) donors. E) Scatter plot showing frequencies of CD137<sup>+</sup> IFN- $\gamma$ <sup>+</sup> cells of total CD8<sup>+</sup> T  
157 cells of CMV<sup>+</sup> (green, N=28) and CMV<sup>-</sup> (grey, N=39) donors. F) Frequencies of CD137<sup>+</sup>IFN- $\gamma$ <sup>+</sup>  
158 cells of total CD8<sup>+</sup> T cells in the spike-stimulated condition (spike response) plotted against pp65-  
159 stimulated condition (pp65 response).

160 **Figure 1 - figure supplement 1**

161 Flow cytometry gating example for peptide stimulation assays

162 **Figure 1 – Source data 1**

163 Source data containing the percentages underlying figure 1C-F.

164

165

166



167 **Pre-pandemic SARS-CoV-2-specific CD4<sup>+</sup> and CD8<sup>+</sup> T cells recognize pp65 peptides from**  
168 **CMV**

169 To confirm that pre-pandemic SARS-CoV-2-specific T cells are able to recognize peptides from  
170 pp65, these SARS-CoV-2-specific T cells were isolated and clonally expanded. SARS-CoV-2-  
171 unexposed (pre-pandemic cryopreserved) PBMCs from a CMV<sup>+</sup> individual showing a CD4<sup>+</sup> T cell  
172 response against SARS-CoV-2 membrane protein (donor UGT) were stimulated with the  
173 membrane peptide pool and single cell sorted based on CD137 upregulation (**Figure 2 – figure**  
174 **supplement 1**). After clonal expansion, 20 out of 27 screened T cell clones produced IFN- $\gamma$   
175 when stimulated with membrane peptide pool compared to no peptide stimulation (data not  
176 shown). T cell clones 4UGT5, 4UGT8 and 4UGT17, all three expressing a different TCR, were  
177 used for further experiments (**Figure 2 – figure supplement 2A**). As hypothesized, the T cell  
178 clones were reactive against both SARS-CoV-2 membrane antigen and CMV pp65 when loaded  
179 on HLA-matched Epstein-Barr virus lymphoblastoid cell lines (EBV-LCLs) (**Figure 2A**).  
180 Interestingly, IFN- $\gamma$  production by the T cell clones was significantly increased when stimulated  
181 with pp65 peptides compared to membrane peptides indicating higher avidity for CMV compared  
182 to SARS-CoV-2 (**Figure 2B**). To identify which peptide in pp65 is recognized, reactivity of T cell  
183 clone 4UGT8 against a pp65 library was measured which resulted in recognition of three sub  
184 pools which contained peptide AGILARNLVPM (**Figure 2 – figure supplement 2B-C**). HLA-  
185 mismatched EBV-LCLs were retrovirally transduced with HLA Class II molecules that were  
186 commonly shared between donors that had a detectable CD4<sup>+</sup> T cell response against the  
187 membrane and pp65 peptide pool (**Figure 1D**). T cell clone 4UGT8 recognized both peptide  
188 pools and the AGI peptide only when presented in HLA-DRB3\*02:02 (**Figure 2C and figure 2 –**  
189 **figure supplement 2D**). The SARS-CoV-2 membrane protein epitope recognized by these  
190 cross-reactive T cells remains unidentified as *in vitro* experiments and *in silico* prediction  
191 methods failed to identify the epitope. A similar approach was applied for CD8<sup>+</sup> T cells in which T  
192 cell clones were generated after SARS-CoV-2 spike peptide pool stimulation of PBMCs from  
193 CMV<sup>+</sup> donor UTT (**Figure 2 – figure supplement 1**). The isolated CD8<sup>+</sup> T cell clones were  
194 screened for their reactivity with SARS-CoV-2 spike which showed that 23 out of the 28 T cell

195 clones produced IFN- $\gamma$  upon spike peptide pool stimulation (data not shown). TCR sequencing  
196 revealed that all 23 T cell clones expressed the same TCR (**Figure 2 – figure supplement 3A**).  
197 T cell clone 8UTT6 was selected for further testing and analyzed for its cross-reactivity towards  
198 SARS-CoV-2 spike and CMV pp65 peptide pools. Additionally, the HLA restriction of T cell clone  
199 8UTT6 was hypothesized to be HLA-B\*35:01 as the unexposed donors with a CD8<sup>+</sup> T cell  
200 response against SARS-CoV-2 spike (UTT and UBV) both expressed HLA-B\*35:01. The results  
201 confirmed that T cell clone 8UTT6 recognized spike as well as pp65 peptide pool presented by  
202 K562 cells transduced with HLA-B\*35:01 but not transduced with HLA-A\*11:01 (**Figure 2D**). To  
203 identify the spike epitope, reactivity of clone 8UTT6 against the 15-mer spike peptide library was  
204 measured. For the identification of the CMV epitope, an unbiased approach was performed using  
205 the nonamer combinatorial peptide library (CPL) assay. Recognition patterns were analyzed  
206 using netMHC 4.0 analysis for predicted binding to HLA-B\*35:01, which revealed SARS-CoV-2  
207 spike peptide FVSNQTHWF (FVS, S<sub>1094-1103</sub>) and CMV pp65 IPSINVHHY (IPS, pp65<sub>112-121</sub>) as  
208 the most likely epitopes (**Figure 2 – figure supplement 3B-E**). The FVS and IPS peptides were  
209 indeed recognized by clone 8UTT6 (**Figure 2E**). Importantly, the IPS peptide was recognized  
210 with higher avidity compared to the FVS peptide by clone 8UTT6 (**Figure 2F**). Supporting these  
211 findings, the same TCR $\beta$  chain was already described and demonstrated to be specific for IPS in  
212 HLA-B\*35:01 (Klarenbeek et al., 2012). Taken together, SARS-CoV-2 reactive CD4<sup>+</sup> and CD8<sup>+</sup> T  
213 cells in pre-pandemic samples cross-reacted with CMV and SARS-CoV-2 peptides.

214

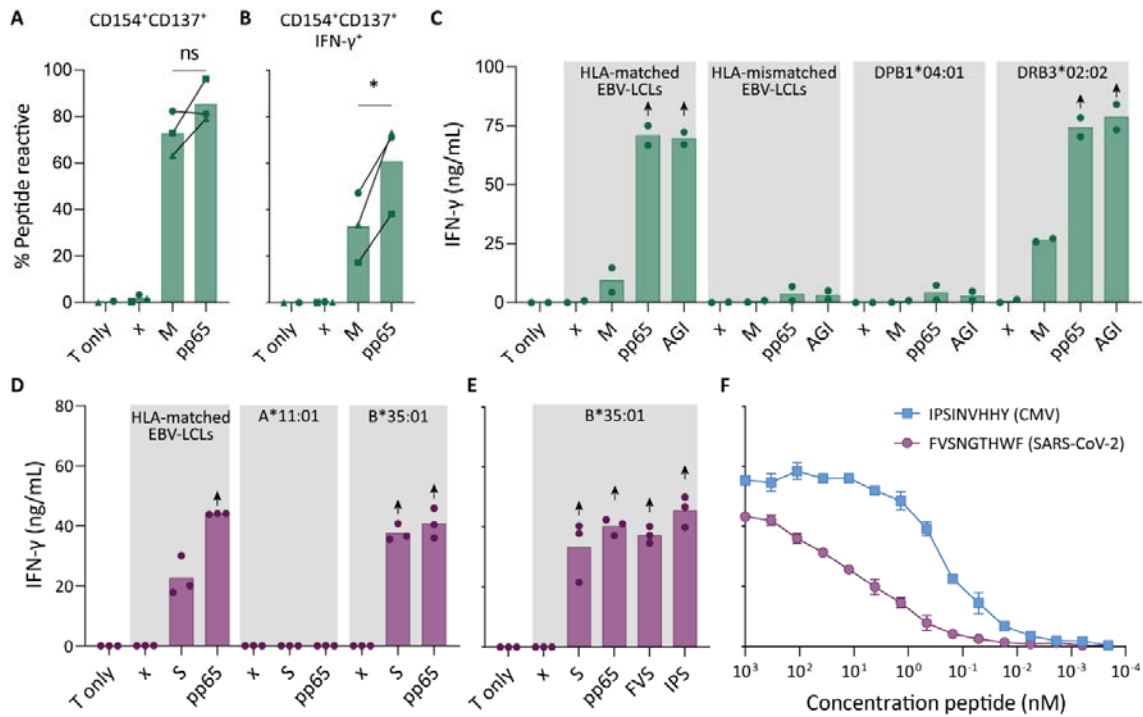

215

216 **Figure 2** Recognition of SARS-CoV-2 and CMV by pre-existing CD4<sup>+</sup> and CD8<sup>+</sup> T cells

217 Clonally expanded CD4<sup>+</sup> T cells from donor UGT and CD8<sup>+</sup> T cells from donor UTT were  
 218 overnight co-cultured with peptide-pulsed stimulator cells. A-B) Percentages of CD154<sup>+</sup>, CD137<sup>+</sup>  
 219 and/or IFN- $\gamma$ <sup>+</sup> cells of cross-reactive CD4<sup>+</sup> T cell clones after overnight culture (T only) or after  
 220 overnight co-culture with HLA-matched EBV-LCLs that were not peptide pulsed (x) or loaded with  
 221 membrane (M) or pp65 peptide pool, measured by flow cytometry. Dots represent the mean of  
 222 experimental repeats of 4UGT5 (square, 1 repeat), 4UGT8 (circles, 4 repeats) and 4UGT17  
 223 (triangle, 2 repeats). Significance was tested by a paired *t*-test. C) Bar graphs showing ELISA  
 224 measurement of secreted IFN- $\gamma$  after co-culturing of a representative clone, 4UGT8 clone, with  
 225 HLA-matched or HLA-mismatched EBV-LCLs. HLA-mismatched EBV-LCLs were retrovirally  
 226 transduced with HLA class II molecule as depicted in figure. Stimulator cells were peptide-pulsed  
 227 with membrane (M) peptide pool, pp65 peptide pool or AGILARNLVPM (AGI) peptide. Data  
 228 points are experimental duplicates. Black arrows indicate that values were above plateau value  
 229 of the ELISA calibration curve. D-E) Bar graphs showing ELISA measurement of secreted IFN- $\gamma$   
 230 after co-culturing of a representative clone, 8UTT6 clone, with HLA-matched EBV-LCLs or K562s  
 231 transduced with HLA-B\*35:01 or HLA-A\*11:01. Stimulator cells were peptide-pulsed with spike

232 (S) peptide pool, pp65 peptide pool, IPSINVHHY (IPS) peptide or FVSNQTHWF (FVS) peptide.

233 Data points are technical triplicates. F) Peptide titration of IPS peptide (blue) and FVS peptide

234 (purple) in a co-culture assay with 8UTT6 clone.

235 **Figure 2 - figure supplement 1**

236 Flow-activated cell sorting gating example for peptide stimulation assays

237 **Figure 2 - figure supplement 2**

238 TCR sequence and peptide identification of 4UGT8 clone

239 **Figure 2 - figure supplement 3**

240 TCR sequence and peptide identification of 8UTT6 clone

241 **Similarity at the C-terminal part of the peptides could drive T cell cross-reactivity**

242 To understand the molecular basis of T cell cross-reactivity between dissimilar peptides FVS and

243 IPS, we modelled the FVS structure based on the solved structure of the IPS peptide bound to

244 HLA-B\*35:01 (**Figure 3**) (Pellicci et al., 2014). The two peptides share 2 residues (P3-S and P7-

245 H) and have 2 similar residues (P6-T/V and P9-F/Y) based on similar biochemical properties and

246 size. Residue substitutions from the IPS to FVS peptide were possible without major steric

247 clashes with the HLA or peptide residues. The lack of secondary anchor residue at position 5 in

248 the FVS peptide (P5-N/G) might change the conformation of the central part of the peptide, that

249 could be similar to the one observed in the spike-derived peptide IPF (S<sub>896-904</sub>) in complex with

250 HLA-B\*35:01 (**Figure 3 – figure supplement 1**) (Nguyen et al., 2021). The primary anchor in the

251 FVS peptide are P2-V and P9-F, both within the favored residues at those positions for HLA-B35-

252 restricted peptide (Escobar et al., 2008). Overall, the FVS peptide might adopt a similar

253 backbone conformation compared to the IPS peptide, which would place in both peptides a small

254 hydrophobic residue at position 6 (P6-T/V), a histidine at position 7, and a residue with a large

255 side-chain at position 8 (P8-W/H).

256

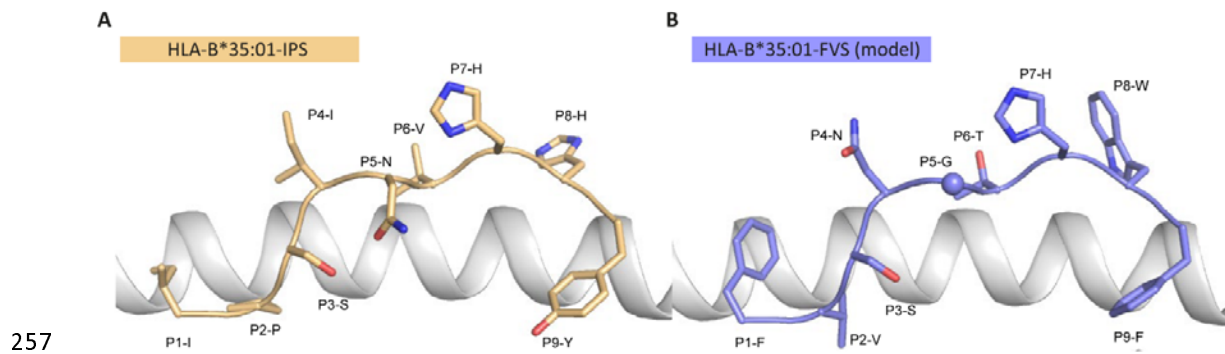

258 **Figure 3** Model of the HLA-B\*35:01-FVS structure

259 A) Crystal structure of the HLA-B\*35:01-IPS complex with the HLA in white cartoon and the IPS  
260 peptide in clear orange cartoon and stick. B) Model of the HLA-B\*35:01-FVS complex with the  
261 HLA in white cartoon and the FVS peptide in blue cartoon and stick. The sphere represents the  
262 C $\alpha$  atom of the FVS peptide P5-G residue.

263 **Figure 3 – figure supplement 1**

264 Structural overlay of HLA-B\*35:01-IPF structure with the model of the HLA-B\*35:01-FVS

265

266 **IPS/FVS-specific cross-reactive CD8<sup>+</sup> T cells are detectable in multiple individuals**

267 To investigate the prevalence and phenotype of IPS/FVS cross-reactive T cells, HLA-B\*35:01<sup>+</sup>  
268 CMV<sup>+</sup> healthy donors were screened for IPS/FVS-specific T cells using tetramers consisting of  
269 HLA-B\*35:01-FVS (B\*35/FVS-tetramer) and HLA-B\*35:01-IPS (B\*35/IPS-tetramer) (**Figure 4 -**  
270 **figure supplement 1**). Tetramer staining of PBMCs from donor UTT demonstrated that not all T  
271 cells that bound to B\*35/IPS-tetramer were able to bind to the B\*35/FVS-tetramer as well.  
272 However, all T cells that bound to B\*35/FVS-tetramer were also binding to the B\*35/IPS-tetramer  
273 (**Figure 4A**). This observation indicates that IPS/FVS cross-reactivity is dictated by specific TCR  
274 sequences which was further supported by the lack of binding to B\*35/FVS-tetramer by an IPS-  
275 specific T cell clone with a different TCR (**Figure 4B**). Screening of SARS-CoV-2-unexposed,  
276 CMV<sup>+</sup> and HLA-B\*35(:01) donors (N=37) showed that nearly all CMV<sup>+</sup> donors had IPS-specific T  
277 cells with frequencies above background level and, interestingly, three of the analyzed donors  
278 (UTT, UBV and SFW) presented with clearly detectable IPS/FVS-specific T cells (**Figure 4C**).  
279 Furthermore, IPS/FVS-specific T cells displayed an effector memory phenotype (CCR7<sup>+</sup>CD45RA<sup>-</sup>  
280 ), confirming a memory repertoire origin and, interestingly, a less differentiated phenotype  
281 compared to IPS-specific T cells (**Figure 4D**). In summary, IPS/FVS cross-reactivity is  
282 dependent on the TCR clonotype and these cross-reactive T cells are detected in multiple  
283 donors.

284

285

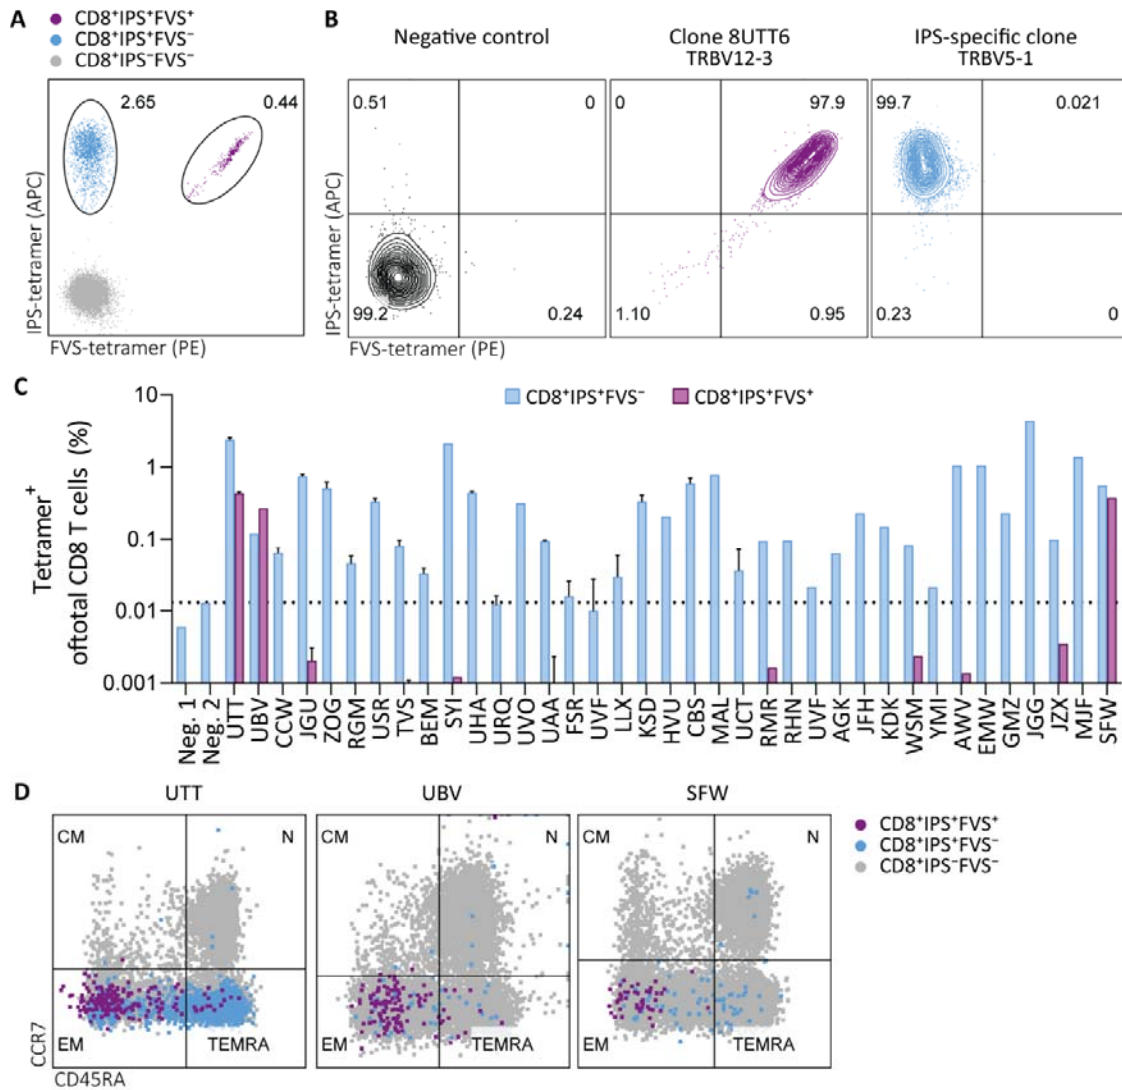

286

287 **Figure 4** Tetramer detection of IPS/FVS-specific CD8<sup>+</sup> T cells in CMV<sup>+</sup> and HLA-B\*35:01<sup>+</sup> donors

288 Flow cytometry measurement of PBMCs or T cell clones that are binding to B\*35/IPS-tetramer

289 (blue), B\*35/FVS-tetramer (purple) or to neither (grey). A) Flow cytometry dot plot showing

290 percentages of tetramer-binding cells of total CD8<sup>+</sup> T cells in PBMCs from donor UTT. B) Dot plot

291 showing percentages of tetramer-binding of 8UTT6 clone and an IPS-specific clone with their

292 IMGT variable region of T cell receptor  $\beta$ -chain (TRBV) depicted. As a negative control (neg.

293 ctrl.), a T cell clone recognizing a non-relevant peptide in HLA-B\*35:01 was included. C) Bar

294 graph showing frequencies of tetramer-binding of total CD8<sup>+</sup> from PBMCs of healthy CMV<sup>+</sup> and

295 HLA-B\*35:(01)<sup>+</sup> donors. Error bars represent standard deviation of experimental duplicates.

296 Dotted line represents background level which was based on HLA-B\*35:01<sup>-</sup> donors (neg.). D) Dot  
297 plot showing expression of CCR7 and CD45RA by total CD8<sup>+</sup> T cells and tetramer-binding T cells  
298 in PBMCs from UTT, UBV and SFW. Quadrants separates differentiation subsets into naïve (N),  
299 central memory (CM), effector memory (EM) and terminally differentiated effector memory  
300 (TEMRA).

301 **Figure 4 - figure supplement 1**

302 Flow cytometry gating example for tetramer staining



303 **IPS/FVS cross-reactivity is underpinned by a public TCR**

304 To investigate whether the IPS/FVS-specific CD8<sup>+</sup> T cells found in multiple donors expressed a  
305 similar TCR, B\*35/FVS-tetramer-binding T cells were isolated and the TCR  $\alpha$  and  $\beta$  chains  
306 sequenced (**Figure 5 - figure supplement 1**). Sequencing was performed for samples with clear  
307 detection of IPS/FVS-specific T cells (UTT, UBV, SFW) and one donor with detectable, but below  
308 the limit of accurate detection of B\*35/FVS-tetramer<sup>+</sup> T cells (JZX) (**Figure 4C**). Interestingly,  
309 B\*35/FVS-isolated T cells from all donors displayed amino acid identical dominant  
310 complementary-determining region 3 (CDR3) of the  $\alpha$ -chain, CAGNQQGKLIF (CDR3 $\alpha^{\text{CAGNQG}}$ ),  
311 and  $\beta$ -chain, CASSLALDEQFF (CDR3 $\beta^{\text{CASSLA}}$ ) (**Figure 5A**). This observation thereby shows that  
312 IPS/FVS cross-reactivity is caused by a public TCR. These identical CDR3s were not a result of  
313 sequencing artefact as nucleotide alignment revealed minor differences between samples  
314 (**Figure 5 – figure supplement 2**). In addition to B\*35/FVS-isolated T cells, T cells that bound  
315 B\*35/IPS-tetramer were isolated and sequenced in parallel. Both CDR3 $\alpha^{\text{CAGNQG}}$  and  
316 CDR3 $\beta^{\text{CASSLA}}$  were identified in all samples and shown to be among the most dominant TCRs.  
317 Remarkably, this was also observed in donor JZX which showed IPS/FVS-tetramer<sup>+</sup> T cells  
318 below background level, indicating that in more than 3 out of 37 donors this public TCR is  
319 present. (**Figure 5C**). Taken together, IPS/FVS-specific T cells express an identical TCR, found  
320 in multiple donors, indicating that public TCRs can exhibit cross-reactive properties.

321

322

323

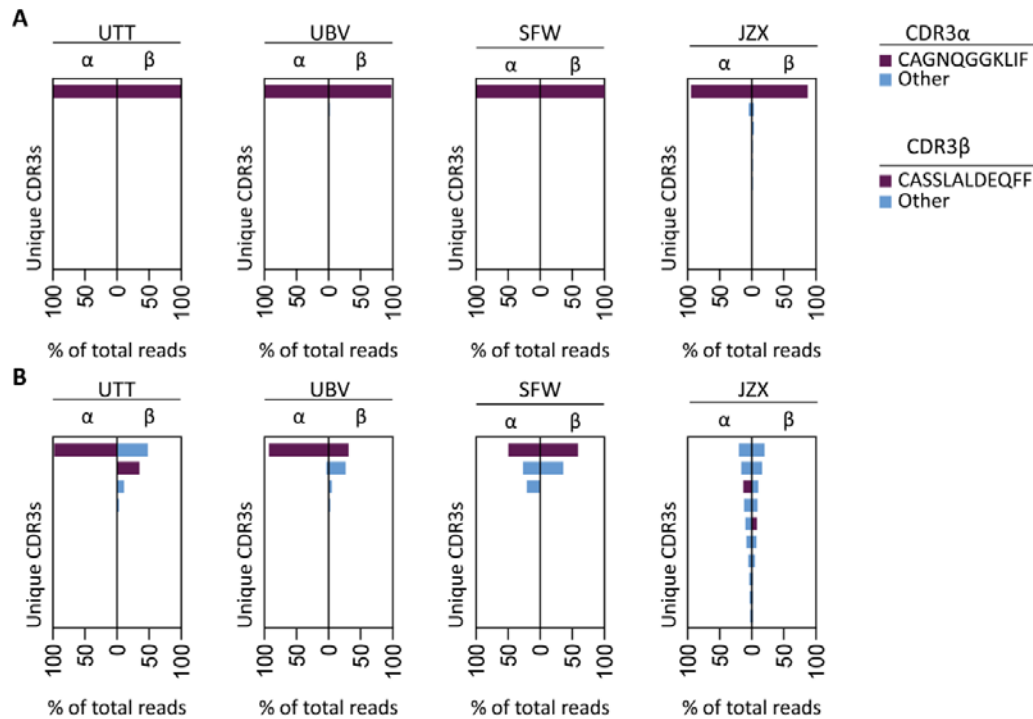

324

325 **Figure 5** TCR sequencing of IPS/FVS-specific T cells

326 PBMCs from healthy CMV<sup>+</sup> and HLA-B\*35:01<sup>+</sup> donors were sorted on B\*35/IPS- or B\*35/FVS-  
 327 tetramer binding and directly sequenced for their TCR alpha and beta chain. Unique CDR3  
 328 sequences are depicted in two-sided bar graphs in which the left side shows abundance of  
 329 CDR3 sequences from the TCR α-chain (CDR3α) and the right side shows abundance of CDR3  
 330 sequences from the TCR β-chain (CDR3β). Bar graphs are purple if the CDR3α has the  
 331 CAGNQQGKLI sequence or the CDR3β has the CASSLALDEQFF sequence, all other found  
 332 sequences are depicted in blue. CDR3s with less than 1% abundance were excluded from the  
 333 figure. A) Two-sided bar graphs showing abundances of unique CDR3 sequences of samples  
 334 sorted on binding to B\*35/FVS-tetramer. B) Two-sided bar graphs showing abundances of  
 335 unique CDR3 sequences of samples sorted on binding to B\*35/IPS-tetramer.

336 **Figure 5 - Source data 1**

337 Source data containing T cell receptor sequence data underlying figure 4.

338 **Figure 5 - figure supplement 1**

339 Flow activated cell sorting gating example

340 **Figure 5 - figure supplement 2**

341 TCR sequencing of B\*35/FVS-sorted samples

342

343 **IPS/FVS cross-reactive CD8<sup>+</sup> T cells are able to recognize SARS-CoV-2 infected cells but**  
344 **do not show an activated phenotype during acute disease**

345 To investigate whether IPS/FVS-specific CD8<sup>+</sup> T cells can play a role during SARS-CoV-2  
346 infection, the function of IPS/FVS-specific T cells in an *in vitro* model and the activation state of  
347 these T cells during acute SARS-CoV-2 infection in severe COVID-19 patients was assessed.  
348 Firstly, the reactivity of IPS/FVS-specific T cells against K562 transduced with the spike gene  
349 was measured which showed that the T cells were able to recognize endogenously processed  
350 and presented peptide (**Figure 6A**). To investigate whether the IPS/FVS-specific T cells can  
351 recognize SARS-CoV-2-infected cells and thereby limit viral spread, Calu-3 airway epithelial cells  
352 were infected with live SARS-CoV-2 virus (wildtype) and incubated for 6 hours before co-  
353 culturing with CD8<sup>+</sup> T cells. SARS-CoV-2 spike-specific CD8<sup>+</sup> T cells from a SARS-CoV-2  
354 vaccinated donor were able to reduce intracellular SARS-CoV-2 RNA copies at both 0.05 and 0.5  
355 multiplicity of infection (MOI) 24 hours post infection (**Figure 6B-C**). Interestingly, IPS/FVS-  
356 specific CD8<sup>+</sup> T cells were able to reduce SARS-CoV-2 intracellular RNA copies in Calu-3 cells  
357 infected with 0.05 MOI (MOI (**Figure 6B**). Incubating with 10-fold more virus (0.5 MOI) resulted in  
358 no difference in RNA copies compared to the no T cell control (**Figure 6C**). To further investigate  
359 the function of IPS/FVS-specific CD8<sup>+</sup> T cells *ex vivo*, the activation state of these T cells was  
360 evaluated during severe COVID-19 disease in two CMV<sup>+</sup> HLA-B\*35:01<sup>+</sup> patients. The activation  
361 state was measured by expression of activation markers CD38 and HLA-DR as these markers  
362 are highly expressed on SARS-CoV-2-specific CD8<sup>+</sup> T cells during severe COVID-19 (**Figure**  
363 **6D**) (Sekine et al., 2020). Interestingly, IPS/FVS-cross-reactive T cells were detected in 2 out of 2  
364 CMV<sup>+</sup> HLA-B\*35:01<sup>+</sup> patients suffering from severe COVID-19, whereas the cross-reactive T  
365 cells were detected in 3 out of 37 healthy CMV<sup>+</sup> HLA-B\*35:01<sup>+</sup> donors (**Figure 4C and 6E**). The  
366 expression of CD38 and HLA-DR was lower compared to the SARS-CoV-2-specific CD8<sup>+</sup> T cells  
367 and not considerably increased compared to IPS-specific T cells that were not cross-reactive  
368 with FVS (**Figure 6D-E**). These results indicate that IPS/FVS-specific CD8<sup>+</sup> T cells recognize  
369 SARS-CoV-2-infected cells and are able to limit SARS-CoV-2 replication at low virus titers.

370 However, IPS/FVS-specific T cells did not show an activated phenotype during acute severe

371 SARS-CoV-2 infection.

372

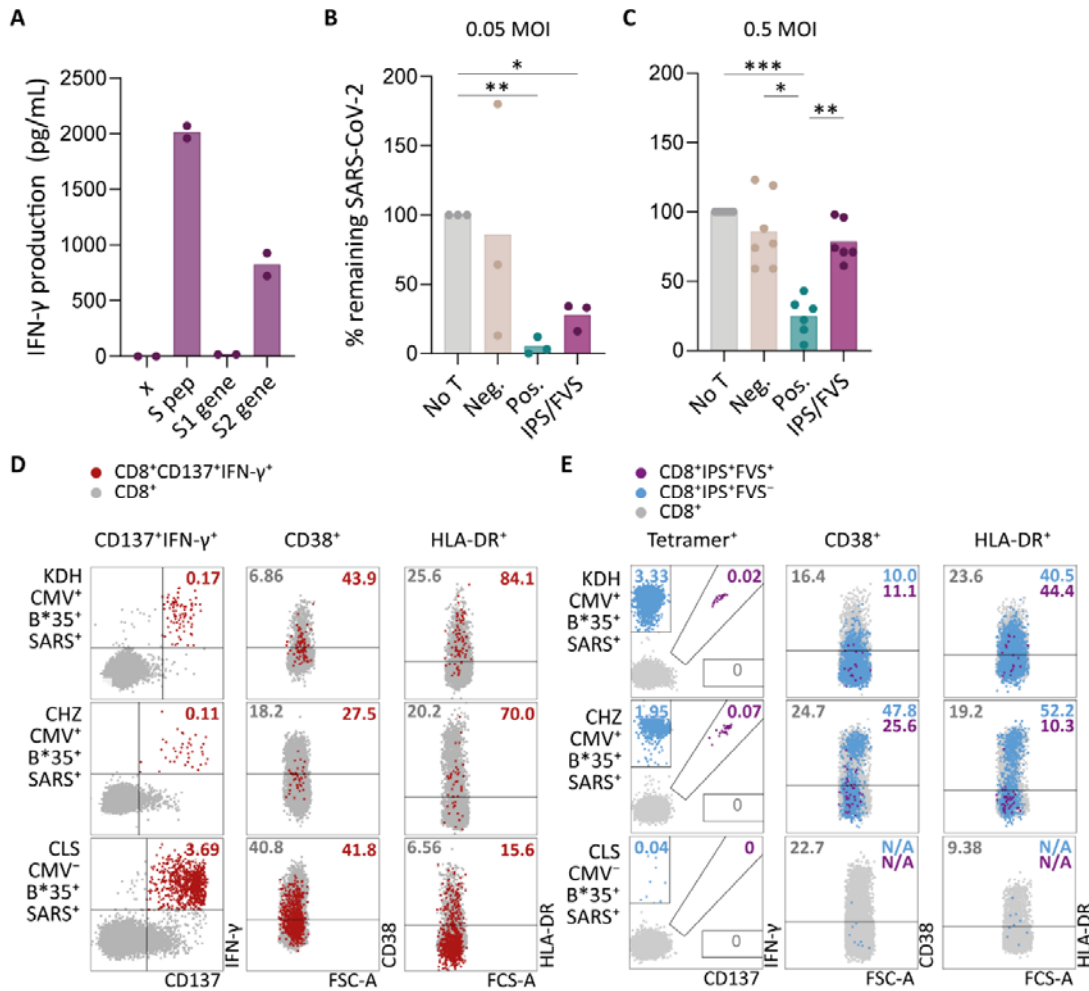

373

374 **Figure 6** *Ex vivo* and *in vitro* evaluation of IPS/FVS-specific T cells

375 A) IFN- $\gamma$  release of IPS/FVS-specific CD8<sup>+</sup> T cells after co-incubation with K562 that were  
 376 untransduced (x), loaded with spike peptide pool (S pep), or transduced with nucleotide 1 to  
 377 2082 (S1 gene) or nucleotide 2052 to 3822 (S2 gene) of the spike gene. B-C) Calu-3 cells were  
 378 transduced to express HLA-B\*35:01 and infected with the wildtype SARS-CoV-2 virus. 6 hours  
 379 post infection, IPS/FVS-specific CD8<sup>+</sup> T cells were added in a 10:1 effector to target ratio. SARS-  
 380 CoV-2 spike-specific T cells, isolated from COVID-19 vaccinated individuals, that recognize  
 381 VASQSIIAY presented in HLA-B\*35:01 or YLQPRTFLL presented in HLA-A\*02:01 functioned as  
 382 a positive control (pos.) or negative control (neg.), respectively. Cells were harvested 24 hpi to  
 383 measure intracellular viral RNA. Bar graphs show the means of percentage reduction in SARS-  
 384 CoV-2 intracellular RNA copies compared to the no T cell condition (no T) as measured by RT-  
 385 qPCR, at 24 hpi post infection using a MOI of 0.05 or 0.5. One-way ANOVA was applied test

386 statistical differences between conditions and only comparisons with  $p < 0.05$  are shown. (D-E)  
387 Flow cytometry analysis of CD38 and HLA-DR expression on CD8<sup>+</sup> T cells in PBMCs from  
388 severe COVID-19 patients that were CD137<sup>+</sup>IFN- $\gamma$ <sup>+</sup> after SARS-CoV-2 nucleocapsid peptide  
389 stimulation (red), only bound to B\*35/IPS-tetramer (blue) or bound to both B\*35/IPS- and  
390 B\*35/FVS-tetramer (purple). All other CD8<sup>+</sup> T cells are grey. Two patients were HLA-  
391 B\*35:01<sup>+</sup>CMV<sup>+</sup> (KDH and CHZ) and, as a control, one patient was HLA-B\*35:01<sup>+</sup>CMV<sup>-</sup> (CLS).  
392 Detection of B\*35/IPS- and B\*35/FVS-specific T cells and expression of the activation markers  
393 were measured and compared within the same sample.

394

395

396 Discussion

397 SARS-CoV-2-specific T cells in pre-pandemic cryo-preserved samples have been reported in  
398 several studies. The majority of these studies describe T cell immunity against other HCoVs as  
399 the main source of these T cells (Bacher et al., 2020; Braun et al., 2020; Johansson et al., 2021;  
400 Kundu et al., 2022; Le Bert et al., 2020; Loyal et al., 2021; Mateus et al., 2020). However, some  
401 studies have postulated that pre-pandemic SARS-CoV-2-specific T cells could be derived from  
402 other sources (Le Bert et al., 2020; Peng et al., 2020; Stervbo et al., 2020; C. C. S. Tan et al.,  
403 2021). Our findings demonstrate that CMV pp65-specific CD4<sup>+</sup> T cells cross-react with the  
404 membrane protein from SARS-CoV-2 and CMV pp65-specific CD8<sup>+</sup> T cells are able to cross-  
405 react with SARS-CoV-2 spike protein. The cross-reactive CD8<sup>+</sup> T cells recognized known CMV  
406 epitope IPSINVHHY in HLA-B\*35:01 and cross-reacted with the SARS-CoV-2 epitope  
407 FVSNNGTHWF in HLA-B\*35:01. These IPS/FVS-specific CD8<sup>+</sup> T cells were detected in multiple  
408 donors all expressing an identical T cell receptor, indicating that cross-reactivity with SARS-CoV-  
409 2 can be caused by a CMV-specific public TCR. Functional and phenotypic assessment of the  
410 IPS/FVS-specific CD8<sup>+</sup> T cells indicated their capacity to reduce low concentrations of SARS-  
411 CoV-2 *in vitro* but these cross-reactive T cells detected in two severe COVID-19 patients were  
412 not activated based on phenotypic characterization.

413 To our knowledge this is the first study to identify CMV-specific T cells that are cross-reactive  
414 with SARS-CoV-2. The cross-reactive CD4<sup>+</sup> T cells recognized CMV pp65 epitope  
415 AGILARNLVPM in HLA-DRB3\*02:02 and were able to cross-react with an as of yet unidentified,  
416 SARS-CoV-2 membrane epitope in HLA-DRB3\*02:02. (Weber et al., 2022) Previous studies have  
417 reported the presence of membrane-specific CD4<sup>+</sup> T cell responses in SARS-CoV-2-unexposed  
418 donors utilizing the same commercially available membrane peptide pool, yet these studies did  
419 not aim to identify the peptide-HLA restriction (Bacher et al., 2020; Sekine et al., 2020). AGI-  
420 specific CD4<sup>+</sup> T cells have been described to be cross-reactive towards SARS-CoV-2 spike  
421 which is in contrast to our finding (Weber et al., 2022). The cross-reactive CD8<sup>+</sup> T cells recognize  
422 the CMV epitope IPSINVHHY and SARS-CoV-2 epitope FVSNNGTHWF presented in HLA-  
423 B\*35:01. IPS/FVS-specific T cells were possibly detected previously but never further



424 investigated or characterized (Shomuradova et al., 2020; Tarke et al., 2021). Both cross-reactive  
425 CD4<sup>+</sup> and CD8<sup>+</sup> T cells displayed a higher avidity for the CMV epitope compared to the epitope  
426 derived from SARS-CoV-2. In contrast, other studies have reported an equal or even higher  
427 avidity for the SARS-CoV-2 epitope compared to the epitopes derived from the HCoV for which  
428 the T cells were hypothesized to be primed against (Braun et al., 2020; Johansson et al., 2021;  
429 Lineburg et al., 2021; Mateus et al., 2020). This appears to be contradictory since it has been  
430 shown that repeated exposure results in selection of high avidity T cell clonotypes which are able  
431 to clear viral infection and protect against reinfection (Abdel-Hakeem et al., 2017; Hombrink et  
432 al., 2013; Price et al., 2005; Schober et al., 2018). Cross-reactive T cells would therefore most  
433 likely display a higher avidity for the source pathogen compared to the avidity for SARS-CoV-2,  
434 as reported in this study. This discrepancy could be caused by the fact that previous studies  
435 focused on other HCoVs since they share high sequence homology with SARS-CoV-2, thereby  
436 potentially missing the true source of these particular T cells (Bacher et al., 2020; Braun et al.,  
437 2020; Johansson et al., 2021; Kundu et al., 2022; Le Bert et al., 2020; Loyal et al., 2021; Mateus  
438 et al., 2020). Alternatively, samples frozen down during the pandemic were considered  
439 unexposed if the donors displayed neither SARS-CoV-2-specific antibodies nor a history of  
440 COVID-19-like symptoms (Bacher et al., 2020; Braun et al., 2020; Lineburg et al., 2021).  
441 However, SARS-CoV-2 infection does not necessarily lead to symptoms nor a detectable  
442 antibody response (Gao et al., 2021; Steiner et al., 2021). The described reduced avidity for  
443 HCoV therefore could imply that these cross-reactive T cells were derived from the SARS-CoV-  
444 2-induced repertoire. Taken together, whereas cross-reactive T cells recognizing SARS-CoV-2  
445 have been primarily described to be derived from other HCoVs, the contribution of these other  
446 HCoVs as initial primers of the T cell response may have been over-estimated due to  
447 experimental design. Further studies are required to identify other potential sources of cross-  
448 reactivity with low sequence homology yet high prevalences such as CMV, EBV, influenza or  
449 non-viral pathogens.

450 The identified cross-reactive CD8<sup>+</sup> T cells appeared to recognize CMV peptide IPSINVHHY and  
451 a dissimilar peptide FVSNATHWF derived from SARS-CoV-2. *Ex vivo* detected heterologous  
452 CD8<sup>+</sup> T cell immunity against two pathogens caused by dissimilar epitopes presented in the

453 same HLA is rarely reported (Clute et al., 2005; Cornberg et al., 2010). Nevertheless, ample  
454 studies have investigated the underlying mechanisms of such T cell-mediated cross-reactivity.  
455 Heterologous immunity can be caused by the expression of a dual TCR which means that two  
456 TCR  $\alpha$ - or  $\beta$ -chains are expressed simultaneously, resulting in two distinctive TCRs within one T  
457 cell (Cusick et al., 2012). However, here we identified a single TCR in cross-reactive T cells  
458 excluding this hypothesis. Recognition of two distinct epitopes by a single TCR can be explained  
459 by shape similarity once the peptides are bound to the HLA molecule, and this shape similarity,  
460 or molecular mimicry, can underpin T cell cross-reactivity (Macdonald et al., 2009). Possible  
461 other underlying mechanisms are reduced footprint of the TCR with peptide (Birnbbaum et al.,  
462 2014; Cole et al., 2016), an altered TCR-docking angle (Adams et al., 2011), or plasticity of the  
463 peptide-MHC complex (Adams et al., 2011; Riley et al., 2018) or TCR (Piepenbrink et al., 2013).  
464 Here, similarity between the IPS and FVS peptides in backbone conformation and the C-terminal  
465 part might underpin the T cell cross-reactivity observed, as the majority of TCR docks  
466 preferentially towards the C-terminal of the peptide (Szeto et al., 2020). Solving the crystal  
467 structure of the IPS/FVS-TCR binding to HLA-B\*35:01-FVS and -IPS would be necessary to  
468 provide insight in the binding properties of the public TCR.

469 IPS/FVS-specific CD8<sup>+</sup> T cells were able to reduce SARS-CoV-2 spread *in vitro* when exposed to  
470 a low virus concentration, which is supported by our finding that two out of two tested severe  
471 COVID-19 patients had clearly detectable IPS/FVS-specific CD8<sup>+</sup> T cells while the prevalence in  
472 healthy donors was 3 out of 37. The presence of these cross-reactive memory T cells in  
473 circulation may be an advantage during initial SARS-CoV-2 infection as rapid T cell responses  
474 were associated with less severe COVID-19 (Loyal et al., 2021; Sette & Crotty, 2021; A. T. Tan  
475 et al., 2021). However, the cross-reactive CD8<sup>+</sup> T cells were less efficient compared to SARS-  
476 CoV-2-specific, vaccination-primed T cells in limiting viral spread *in vitro* which can be explained  
477 by the reduced avidity of the cross-reactive T cells for the spike protein compared to CMV. This  
478 study also demonstrated that IPS/FVS-specific CD8<sup>+</sup> T cells did not display the same degree of  
479 activation as observed for the SARS-CoV-2-specific T cells during severe COVID-19.  
480 Additionally, despite the presence of the cross-reactive CD8<sup>+</sup> T cells, these individuals developed  
481 severe disease. These observations together indicate that IPS/FVS-specific CD8<sup>+</sup> T cells might

482 be able to reduce SARS-CoV-2 spread at initial infection, but likely do not play a significant role  
483 in the pathogenesis of severe COVID-19. One limitation is that our study focused on circulating T  
484 cells, and we cannot exclude the possibility that cross-reactive CD8<sup>+</sup> T cells present in lung  
485 tissue did display an activated phenotype. Another limitation of this study is the small severe  
486 COVID-19 cohort that was investigated and literature describing the role of cross-reactive T cells  
487 is scarce (Bacher et al., 2020; Kundu et al., 2022). In summary, additional studies using larger  
488 cohorts are required to fully elucidate the potential role of cross-reactive CD8<sup>+</sup> T cells in disease.

489 In conclusion, pre-pandemic SARS-CoV-2-specific T cells can derive from non-homologous  
490 pathogens such as CMV. This expands the potential origin of these pre-pandemic SARS-CoV-2-  
491 specific CD4<sup>+</sup> and CD8<sup>+</sup> T cell beyond other HCoVs. The cross-reactive CD8<sup>+</sup> T cells were  
492 reactive towards dissimilar epitopes and this cross-reactivity was caused by a public TCR, which  
493 has been rarely observed so far. Our data points towards a role of the cross-reactive T cells in  
494 reducing SARS-CoV-2 viral load in the early stages of infection, prior to priming of SARS-CoV-2  
495 specific T cells. Altogether, these results aid in further understanding heterologous T cell  
496 immunity beyond common cold coronaviruses and facilitates the investigation into the potential  
497 role of cross-reactive T cells in COVID-19.

498

499 Methods

500 Key Resourced Table

| <b>Key Resources Table</b>                |                                                                     |                            |                    |                               |
|-------------------------------------------|---------------------------------------------------------------------|----------------------------|--------------------|-------------------------------|
| <b>Reagent type (species) or resource</b> | <b>Designation</b>                                                  | <b>Source or reference</b> | <b>Identifiers</b> | <b>Additional information</b> |
| Peptide, recombinant protein              | SARS-CoV-2 Spike (S), 15-mers, 11aa overlapping peptide pool        | Miltenyi                   | 130-126-701        | 1 µg/mL                       |
| Peptide, recombinant protein              | SARS-CoV-2 Spike (S1), 15-mers, 11aa overlapping peptide pool       | Miltenyi                   | 130-127-041        | 1 µg/mL                       |
| Peptide, recombinant protein              | SARS-CoV-2 Spike (S+), 15-mers, 11aa overlapping peptide pool       | Miltenyi                   | 130-127-312        | 1 µg/mL                       |
| Peptide, recombinant protein              | SARS-CoV-2 Membrane (M), 15-mers, 11aa overlapping peptide pool     | Miltenyi                   | 130-126-703        | 1 µg/mL                       |
| Peptide, recombinant protein              | SARS-CoV-2 Nucleocapsid (N), 15-mers, 11aa overlapping peptide pool | Miltenyi                   | 130-126-699        | 1 µg/mL                       |
| Peptide, recombinant protein              | CMV pp65, 15-mers, 11aa overlapping peptide pool                    | JPT                        | Custom-made        | 1 µg/mL                       |
| Peptide, recombinant protein              | CMV pp65 peptide library, 15-mers, 11aa overlapping                 | JPT                        | Custom-made        | 1 µg/mL                       |
| Peptide, recombinant protein              | SARS-CoV-2 Spike peptide library, 15-mers, 11aa overlapping         | SB Peptides                | SB043              | 1 µg/mL                       |
| Peptide, recombinant protein              | CMV, VFTWPPWQAGILARN                                                | LUMC                       | Custom-made        | 1 µg/mL                       |
| Peptide, recombinant protein              | CMV, PPWQAGILARNLVPM                                                | LUMC                       | Custom-made        | 1 µg/mL                       |
| Peptide, recombinant protein              | CMV, AGILARNLVPMVATV                                                | LUMC                       | Custom-made        | 1 µg/mL                       |
| Peptide,                                  | CMV,                                                                | LUMC                       | Custom-made        | 1 µg/mL                       |

|                              |                                                   |                 |                                     |            |
|------------------------------|---------------------------------------------------|-----------------|-------------------------------------|------------|
| recombinant protein          | ARNLVPMVATVQGQN                                   |                 |                                     |            |
| Peptide, recombinant protein | CMV, VPMVATVQGQNLKYQ                              | LUMC            | Custom-made                         | 1 µg/mL    |
| Peptide, recombinant protein | CMV, AQGDDDVWTSGSDSD                              | LUMC            | Custom-made                         | 1 µg/mL    |
| Peptide, recombinant protein | CMV, SSATACTSGVMTRGR                              | LUMC            | Custom-made                         | 1 µg/mL    |
| Peptide, recombinant protein | CMV, PKRRRHRQDALPGPC                              | LUMC            | Custom-made                         | 1 µg/mL    |
| Peptide, recombinant protein | SARS-CoV-2, FVSNQTHWF                             | LUMC            | Custom-made                         | 1 µg/mL    |
| Peptide, recombinant protein | CMV, IPSINVHHY                                    | LUMC            | Custom-made                         | 1 µg/mL    |
| Antibody                     | rat monoclonal anti-human CCR7 (BV711)            | BD Biosciences  | Cat.#563712<br>RRID:AB_2738386      | FC (1:100) |
| Antibody                     | mouse monoclonal anti-human CD137 (APC)           | BD Biosciences  | Cat.#550890<br>RRID:AB_398477       | FC (1:75)  |
| Antibody                     | mouse monoclonal anti-human CD14 (FITC)           | BD Biosciences  | Cat.#555397<br>RRID:AB_395798       | FC (1:100) |
| Antibody                     | mouse monoclonal anti-human CD154 (Pacific Blue)  | Biolegend       | Cat.#310820<br>RRID:AB_830699       | FC (1:300) |
| Antibody                     | mouse monoclonal anti-human CD19 (FITC)           | BD Biosciences  | Cat.#555412<br>RRID:AB_395812       | FC (1:100) |
| Antibody                     | mouse monoclonal anti-human CD4 (PE-Cy7)          | Beckham Coulter | Cat.#737660<br>RRID:AB_2922769      | FC (1:300) |
| Antibody                     | mouse monoclonal anti-human CD4 (FITC)            | BD Biosciences  | Cat.#555346<br>RRID:AB_395751       | FC (1:30)  |
| Antibody                     | mouse monoclonal anti-human CD4 (BV510)           | BD Biosciences  | Cat.#562970<br>RRID:AB_2744424      | FC (1:300) |
| Antibody                     | mouse monoclonal anti-human CD45RA (PE-Texas-Red) | Invitrogen      | Cat.#MHCD45RA17<br>RRID:AB_10372222 | FC (1:200) |
| Antibody                     | mouse monoclonal anti-human CD8 (APC-H7)          | BD Biosciences  | Cat.#560179<br>RRID:AB_1645481      | FC (1:100) |
| Antibody                     | mouse monoclonal                                  | BD Biosciences  | Cat.#557746                         | FC (1:320) |

|                                           |                                                             |                            |                                 |                                |
|-------------------------------------------|-------------------------------------------------------------|----------------------------|---------------------------------|--------------------------------|
|                                           | anti-human CD8 (PE-Cy7)                                     |                            | RRID:AB_396852                  |                                |
| Antibody                                  | mouse monoclonal anti-human CD8 (Pacific Blue)              | BD Biosciences             | Cat.#558207<br>RRID:AB_397058   | FC (1:500)                     |
| Antibody                                  | mouse monoclonal anti-human IFN- $\gamma$ (Alexa-Fluor 700) | Sony                       | Cat.#3112600<br>RRID:AB_2922770 | FC (1:120)                     |
| Antibody                                  | mouse monoclonal anti-human IFN- $\gamma$ (BV711)           | BD Biosciences             | Cat.#564039<br>RRID:AB_2738557  | FC (1:300)                     |
| Antibody                                  | mouse monoclonal anti-human HLA-DR (Alexa-Fluor 700)        | BD Biosciences             | Cat.#560743<br>RRID:AB_1727526  | FC (1:150)                     |
| Antibody                                  | mouse monoclonal anti-human CD38 (BV605)                    | BD Biosciences             | Cat.#740401<br>RRID:AB_2740131  | FC (1:120)                     |
| Antibody                                  | rat monoclonal anti-mouse CD19 (Mouse)                      | Biolegend                  | Cat.#557399<br>RRID:AB_396682   | FC (1:250)                     |
| Other                                     | Zombie-Red                                                  | Biolegend                  | Cat.#423109                     | FC (1:1000)                    |
| Other                                     | Zombie-Aqua                                                 | BD Biosciences             | Cat.#423101                     | FC (1:1000)                    |
| Other                                     | Brilliant Violet Staining Buffer Plus                       | Beckham Coulter            | Cat.#566385                     | FC (1:10)                      |
| Cell line ( <i>Homo Sapiens</i> )         | K-562                                                       | ATCC                       | CCL-342                         |                                |
| Cell line ( <i>Homo Sapiens</i> )         | Calu-3                                                      | ATCC                       | HTB-55                          |                                |
| Biological sample ( <i>Homo Sapiens</i> ) | PBMCs from 67 healthy donors                                | LUMC Biobank               |                                 | Cryo-preserved before May 2019 |
| Biological sample ( <i>Homo Sapiens</i> ) | PBMCs from critical COVID-19 patient (KDH)                  | LUMC BEAT-COVID consortium | Clinical trial #: NL8589        | Male, 61 years, 31 days ICU    |
| Biological sample ( <i>Homo Sapiens</i> ) | PBMCs from critical COVID-19 patient (CHZ)                  | LUMC BEAT-COVID consortium | Clinical trial #: NL8589        | Male, 76 years, 40 days ICU    |
| Biological sample ( <i>Homo Sapiens</i> ) | PBMCs from critical COVID-19 patient (CLS)                  | LUMC BEAT-COVID consortium | Clinical trial #: NL8589        | Male, 71 years, 107 days ICU   |

501

502

### 503 **Study samples and cell lines**

504 Bio-banked PBMCs were cryopreserved after informed consent from the respective donors, in  
505 accordance with the declaration of Helsinki. The samples from COVID-19 patients were part of a  
506 trial (NL8589) registered in the Dutch Trial Registry and approved by Medical Ethical Committee  
507 Leiden-Den Haag-Delft (NL73740.058.20). All three patients suffered from critical COVID-19 as  
508 categorized according to World Health Organization guidelines (WHO ref#: WHO/2019-  
509 nCoV/clinical/2020.4) (see **Supplementary file 1** for patient details). Bio-banked PBMCs from  
510 CMV-seropositive (N=28) and CMV-seronegative (N=39) donors that were frozen down before  
511 May 2019 were randomly selected to assure that the samples are SARS-CoV-2 naïve and  
512 represent the European population (**Supplementary file 2**). Prior to cryopreservation, PBMCs  
513 were isolated from fresh whole blood using Ficoll-Isopaque. PBMCs were thawed in culture  
514 medium consisting of Iscove Modified Dulbecco Medium (IMDM; Lonza, Basel, Switzerland)  
515 supplemented with 10% heat-inactivated fetal bovine serum (FBS; Sigma-Aldrich, Saint Louis,  
516 Missouri), 2.7 mM L-glutamine (Lonza), 100 U/mL penicillin (Lonza) and 100 µg/mL streptomycin  
517 (Lonza) (1% p/s), and subsequently treated with 1.33 mg/ml DNase to minimize cell clumping.  
518 K562 cells (*CCL-243*; American Type Culture Collection (ATCC)) and Calu-3 lung carcinoma  
519 cells (*HTB-55*; ATCC) were regularly checked for the presence of mycoplasma. K562s were  
520 regularly checked to ensure (lack of) HLA expression and calu-3 cells were authenticated by  
521 STR sequencing.

### 522 **Intracellular cytokine staining assay**

523 Thawed PBMCs were stimulated in culture medium supplemented with 1 µg/mL SARS-CoV-2  
524 peptides pools covering the entire spike (Miltenyi, Keulen, Germany), membrane (Miltenyi), or  
525 nucleocapsid (Miltenyi) proteins for one hour at 37°C + 5% CO<sub>2</sub>. The peptides of the spike gene  
526 were by the manufacturer divided over a “S”, “S1” and “S+” pool, wherein “S” covers the most  
527 immunogenic parts of the gene, “S1” mostly covers S1 domain and “S+” mostly covers S2  
528 domain. An additional peptide pool containing 11 amino acid overlapping 15-mer peptides  
529 covering the pp65 antigen from CMV (JPT Peptide Technologies) was included (see  
530 **Supplementary file 3** for peptide details). After one hour stimulation, 5 µg/mL Brefeldin A

531 (Sigma-Aldrich) was added and the samples were incubated for an additional 15 hours at 37°C +  
532 5% CO<sub>2</sub>. The samples were subsequently stained with the viability dye Zombie-Red (Biolegend,  
533 San Diego, California) for 25 minutes at room temperature (RT) after which the cells were  
534 washed in PBS containing 0.8 mg/mL albumin (FACS buffer) and stained with antibodies against  
535 CD4 and CD8 in FACS buffer for 30 minutes at 4°C. Cells were washed in PBS and fixed in 1%  
536 paraformaldehyde for 8 minutes RT followed by a wash and a permeabilization step for 30  
537 minutes at 4°C in FACS buffer supplemented with 1% p/s and 0.1% saponin (permeabilization  
538 buffer). After permeabilization, the cells were stained using an antibody cocktail directed against  
539 CD14, CD19, CD137, CD154 and IFN-γ in permeabilization buffer (see **Supplementary file 4** for  
540 antibody details) for 30 minutes at 4°C. After staining, the samples were washed, resuspended in  
541 permeabilization buffer and measured on a 3-laser aurora (Cytex Biosciences, Fremont,  
542 California).

#### 543 **Isolation of SARS-CoV-2-specific T cells**

544 Thawed PBMCs were stimulated for 16 hours at 37°C + 5% CO<sub>2</sub> using 1 µg/mL of spike  
545 (Miltenyi) or membrane (Miltenyi) peptide pool in culture medium (see **Supplementary file 7** for  
546 peptide details). After stimulation, the cells were washed and stained with antibodies directed  
547 against CD4, CD8 and CD137 in phenol-red free IMDM (Gibco, Waltham, Massachusetts)  
548 containing 2% FBS (Sigma-Aldrich), 1% p/s (Lonza) (sort medium) (see **Supplementary file 4**  
549 for antibody details) for 30 minutes at 4°C. The cells were subsequently washed and  
550 resuspended in sort medium. CD4<sup>+</sup> or CD8<sup>+</sup> and CD137<sup>+</sup> cells were single-cell sorted using an  
551 Aria III cell sorter (BD Biosciences, Franklin Lakes, New Jersey) into a 96-well round-bottom  
552 plate containing 1x10<sup>5</sup> 35-Gy-irradiated PBMCs, 50-Gy-irradiated EBV-LCL-JYs and 0.8 µg/mL  
553 phytohemagglutinin (PHA) (Thermo Fisher, Waltham, Massachusetts) in 100 µL T cell medium  
554 (TCM) consisting of IMDM (Lonza) supplemented with 2.7 mM L-glutamine (Lonza), 100 U/mL  
555 penicillin (Lonza) and 100 µg/mL streptomycin (Lonza), 5% FBS (Sigma-Aldrich), 5% human  
556 serum (Sanquin, Amsterdam, The Netherlands) and 100 IU/mL recombinant human IL-2  
557 (Novartis, Basel, Switzerland). Sorted T cells were clonally expanded to generate T cell clones. T



558 cell clones were restimulated between day 14-20 post stimulation using PHA, PBMCs and EBV-  
559 LCL-JYs as described above and used for assays between day 7-20 post stimulation.

### 560 **Co-culture assays**

561 To test peptide and HLA restriction, T cell clones were washed and co-cultured with stimulator  
562 cells in a 1:6 effector to stimulator ratio. Stimulator cells consisted of either autologous or HLA-  
563 matched EBV-LCLs or retrovirally transduced K562s. K562 were transduced with a pZLRS or  
564 MP71 vector containing a HLA gene of interested linked to a marker gene, transduction was  
565 performed as previously described (Jahn et al., 2015). Cells were enriched for marker gene  
566 expression using magnetic activated cell sorting (MACS; Miltenyi) or fluorescent activated cell  
567 sorting (FACS) on an Aria III cell sorter (BD Biosciences). Stimulator cells were loaded with  
568 peptides through pre-incubation for 30 minutes at 37°C with 0.01-1 µM peptide (**Supplementary**  
569 **file 3** for peptide details). To identify the pp65 epitope of the CD4<sup>+</sup> T cell clones, a co-culture  
570 assay was performed using a pp65 peptide library. The pp65 library consisted of 15-mer  
571 peptides with 11 amino acid overlap, spanning the whole pp65 gene. The peptides are divided  
572 into matrix pools with horizontal and vertical sub pools so that each pool has a unique peptide  
573 combination and each peptide is in one horizontal and one vertical sub pool. To identify the HLA-  
574 restriction of the CD4<sup>+</sup> T cell clones, the peptides were not washed away during the co-culture  
575 incubation period and HLA class II was knocked out in the T cell clones as previously described  
576 (Morton et al., 2020). However, the protocol was adapted to knock-out Class II Major  
577 histocompatibility complex transactivator (CIITA) by designing two reverse guide RNAs: 5'-  
578 AGTCGCTCACTGGTCCCACTAGG-3' and 5'-CCGTGGACAGTGAATCCACTGGG-3'  
579 (Integrated DNA technologies Inc., Coralville, Iowa). Co-culture assays were incubated overnight  
580 and secreted IFN-γ was measured as an indicator of T cell activity by ELISA (Diaclone,  
581 Besançon, France) as described by the manufacturer.

582 To identify the peptide recognition signature of the CD8 T cell clones, a co-culture assay was  
583 performed using a nonamer combinatorial peptide library (CPL) (Bijen et al., 2018). The 9-mer  
584 CPL scan contains 180 peptide pools with each pool consisting of a mixture of peptides with one  
585 naturally-occurring amino acid fixed at one position (Wooldridge et al., 2010). Co-culture assay

586 was performed as described above with small changes;  $2 \times 10^4$  K562 transduced with HLA-  
587 B\*35:01 were pre-incubated with 100  $\mu$ M CPL peptides for 1 hour at 37°C before  $5 \times 10^3$  T cell  
588 clones were added. After overnight incubation, secreted IFN- $\gamma$  was measured by an IFN- $\gamma$ -ELISA  
589 (Diaclone) and results were analyzed using WSBC PI CPL for viruses (Szomolay et al., 2016;  
590 Wooldridge, 2013). Identified peptides following peptide libraries or CPL were analyzed for  
591 predicted binding to HLA-B\*35:01 using netMHC 4.0 (Andreatta & Nielsen, 2016). Alternatively,  
592 peptide recognition by T cell clones was measured using ICS assay as described above.

### 593 **Peptide-HLA modelling**

594 The binding of FVS in HLA-B\*35:01 was modelled based on the solved crystal structure of the  
595 HLA-B\*35:01-IPS (Pellicci et al., 2014). Each residue of the IPS peptide was mutated to their  
596 corresponding residues in the FVS peptide using the mutagenesis wizard in PyMOL  
597 (Schrodinger, 2015). The residues were mutated into the most favorable rotamer to avoid steric  
598 clashes. No major steric clashes with the peptide or HLA were observed.

### 599 **Tetramer staining**

600  $1-2 \times 10^6$  PBMCs or  $5 \times 10^4$  T cell clones were incubated with in-house generated, PE- or APC-  
601 conjugated tetramers for 30 minutes at RT (Hombrink et al., 2013). After tetramer incubation, the  
602 cells were washed and incubated with an antibody mix targeting CD4, CD8, CD45RA, CCR7,  
603 CD38 and/or HLA-DR. After incubation, cells were washed and resuspended in FACS buffer and  
604 immediately measured on a 3-laser Aurora (Cytex Biosciences).

### 605 **TCR sequencing**

606 PBMCs were thawed and  $10-50 \times 10^6$  cells directly stained with PE-conjugated HLA-B\*35:01-FVS  
607 or HLA-B\*35:01-IPS tetramers. Tetramers were labelled to beads using anti-PE MicroBeads  
608 (Miltenyi) and enriched through magnetic-activated cell sorting (Miltenyi). The tetramer-enriched  
609 cells were washed and incubated with an antibody cocktail targeting CD4 and CD8 (see  
610 **Supplementary file 4** for antibody details) in sort medium. Stained samples were washed in sort  
611 medium and bulk-sorted on an Aria III cell sorter (BD Biosciences) (see **Fig S6B** for a gating

612 example). RNA isolation and TCR sequencing was performed as previously described (Roukens  
613 et al., 2022). In short, cells were directly collected in lysis buffer for RNA isolation using the  
614 ReliaPrep RNA cell Miniprep system (Promega, Madison, Wisconsin). The total RNA yield of  
615 each sample was converted to cDNA using a template-switch oligo primer (TSO) (Eurogentec,  
616 Seraing, Belgium), RNAsin (Promega) and SMARTScribe reverse transcriptase (Takara Bio,  
617 Kusatsu, Japan) (Koning et al., 2017). cDNA was pre-amplified via an IS region in the Oligo dT  
618 primer prior to barcoding on samples containing cDNA from 500 or fewer cells (Picelli et al.,  
619 2013). Barcoded TCR PCR product was generated in two rounds of PCR: in the first PCR  
620 reaction, *TRA* and *TRB* product was generated in separate PCR reactions using Phusion Flash  
621 (Thermo Fisher Scientific), Smartseq2modified PCR primer (Eurogentec) and TRAC or TRBC1/2  
622 specific primers (Eurogentec) (see **Supplementary file 5** for primer list). The PCR product was  
623 then purified using the Wizard SV 96 PCR Clean-Up System (Promega) and barcoded in a  
624 second PCR using two-sided six-nucleotide barcoded primers to discriminate between TCRs of  
625 different T cell populations. PCR products of different T cell populations were pooled, after which  
626 TCR sequences were identified by NovaSeq (GenomeScan, Leiden, The Netherlands).

#### 627 **SARS-CoV-2 infection assay**

628 Calu-3 lung carcinoma cells (*HTB-55*; ATCC) were cultured in Eagle's minimum essential  
629 medium (EMEM, Lonza), supplemented with 9% fetal calf serum (FCS; CapriCorn Scientific,  
630 USA), 1% NEAA (Sigma-Aldrich), 2 mM L-glutamine (Sigma-Aldrich), 1 mM sodium pyruvate  
631 (Sigma-Aldrich) and 100 U/ml of penicillin/streptomycin (P/S; Sigma-Aldrich). Calu-3 cells were  
632 retrovirally transduced with a pLZRS vector containing the HLA-B\*35:01 molecule linked via an  
633 internal ribosome entry site (IRES) sequence to mouse CD19, transduction was performed as  
634 previously described (Jahn et al., 2015). Mouse CD19 was used as a marker gene to enrich for  
635 successfully transduced cells by adding antibodies directed against mouse CD19 and enriching  
636 for stained cells by MACS (Miltenyi) followed by FACS on an Aria III cell sorter (BD Biosciences)  
637 (see **Supplementary file 4** for antibody details). For the infection assay, Calu-3 cells were  
638 seeded in 96-well cell culture plates at a density of  $3 \times 10^4$  cells per well in 100  $\mu$ l culture medium.  
639 Infections were done with clinical isolate SARS-CoV-2/Leiden-0008, which was isolated from a

640 nasopharyngeal sample collected at the LUMC during the first wave of the Corona pandemic in  
641 March 2020 (GenBack: MT705206.1). Cells were infected with SARS-CoV-2 at a multiplicity of  
642 infection (MOI) of 0.05 or 0.5 in 50  $\mu$ l infection medium. After 1.5h, cells were washed three times  
643 with medium and 100  $\mu$ l of medium was added. At 6 hours post infection (hpi) medium was  
644 removed again and 100  $\mu$ l of T cell medium with  $3 \times 10^5$  T cells per well was added. At 24 hpi cells  
645 were harvested to collect intracellular RNA by lysing the cells in 100  $\mu$ l GITC reagent (3M GITC,  
646 2% sarkosyl, 20 mM Tris, 20 mM EDTA) per well. Intracellular RNA was isolated using magnetic  
647 beads and viral RNA was quantified by internally controlled multiplex TaqMan RT-qPCR as  
648 described previously (Salgado-Benvindo et al., 2020).

## 649 **Statistics**

650 Flow cytometry data was unmixing using Spectroflo (Cytex Biosciences) and analyzed using  
651 FlowJo v10.7.1. (BD Biosciences) to set gates on the samples based on the DMSO negative  
652 control in ICS assays or adapted to positive control for tetramer staining (see **Figure 1 – figure**  
653 **supplement 1, figure 2 – figure supplement 1, figure 4 – figure supplement 1 and figure 5 –**  
654 **figure supplement 1**)me for a gating example). Samples were excluded from the analysis if less  
655 than 10,000 events in CD4<sup>+</sup> or CD8<sup>+</sup> gate was measured or if after further testing they appeared  
656 not to be  $\alpha\beta$  T cells. For the SARS-CoV-2 infection assays, experiments were excluded from the  
657 analysis if the positive control had higher SARS-CoV-2 intracellular RNA copies compared to no  
658 T cell condition. Statistical analysis and generation of figures was conducted using GraphPad  
659 Prism 9.0.1 (GraphPad Software). Data was tested for significance using an one-way ANOVA  
660 with  $p$ -values below 0.05 considered as significant.  $p$ -values are categorized in the figures as:  
661 ns=not significant; \* $p$ <0.05; \*\* $p$ <0.01 or \*\*\* $p$ <0.001.

662 TCR sequence data were analysed using MiXCR software (v3.0.13) to determine the V $\alpha$  and V $\beta$   
663 family and CDR3 regions using annotation of the IMGT library (<http://www.imgt.org>; v6) (Bolotin  
664 et al., 2015). CDR3 regions were analysed in RStudio and CDR3 sequences that were non-  
665 functional or had  $\leq 50$  reads were excluded from the analysis.

666

667 **Acknowledgements**

668 The authors like to thank Joost M. Lambooi for critically editing the manuscript. Flow cytometry  
669 was performed at the Flow cytometry Core Facility (FCF) of Leiden University Medical Center  
670 (LUMC) in Leiden, Netherlands (<https://www.lumc.nl/research/facilities/fcf>).

671 **Funding:**

672 This study was financially supported by Health~Holland (#LSHM19088) and Australian National  
673 Health and Medical Research Council (NHMRC), S.G. is supported by an NHMRC Senior  
674 Research Fellowship (#1159272).

675

676

677 References

- 678 Abdel-Hakeem, M. S., Boisvert, M., Bruneau, J., Soudeyns, H., & Shoukry, N. H. (2017). Selective  
679 expansion of high functional avidity memory CD8 T cell clonotypes during hepatitis C virus  
680 reinfection and clearance. *PLoS Pathog*, *13*(2), e1006191.  
681 <https://doi.org/10.1371/journal.ppat.1006191>
- 682 Adams, J. J., Narayanan, S., Liu, B., Birnbaum, M. E., Kruse, A. C., Bowerman, N. A., Chen, W., Levin,  
683 A. M., Connolly, J. M., Zhu, C., Kranz, D. M., & Garcia, K. C. (2011). T cell receptor signaling is  
684 limited by docking geometry to peptide-major histocompatibility complex. *Immunity*, *35*(5),  
685 681-693. <https://doi.org/10.1016/j.immuni.2011.09.013>
- 686 Alanio, C., Verma, A., Mathew, D., Gouma, S., Liang, G., Dunn, T., Oldridge, D. A., Weaver, J. E., Kuri-  
687 Cervantes, L., Pampena, M. B., Unit, U. P. C. P., Betts, M. R., Collman, R. G., Bushman, F. D.,  
688 Meyer, N. J., Hensley, S. E., Rader, D., & Wherry, E. J. (2022). Cytomegalovirus latent  
689 infection is associated with an increased risk of COVID-19-related hospitalization. *J Infect Dis*.  
690 <https://doi.org/10.1093/infdis/jiac020>
- 691 Andreatta, M., & Nielsen, M. (2016). Gapped sequence alignment using artificial neural networks:  
692 application to the MHC class I system. *Bioinformatics*, *32*(4), 511-517.  
693 <https://doi.org/10.1093/bioinformatics/btv639>
- 694 Bacher, P., Rosati, E., Esser, D., Martini, G. R., Saggau, C., Schiminsky, E., Dargvainiene, J., Schroder,  
695 I., Wieters, I., Khodamoradi, Y., Eberhardt, F., Vehreschild, M., Neb, H., Sonntagbauer, M.,  
696 Conrad, C., Tran, F., Rosenstiel, P., Markewitz, R., Wandinger, K. P., Augustin, M., Rybniker,  
697 J., Kochanek, M., Leyboldt, F., Cornely, O. A., Koehler, P., Franke, A., & Scheffold, A. (2020).  
698 Low-Avidity CD4(+) T Cell Responses to SARS-CoV-2 in Unexposed Individuals and Humans  
699 with Severe COVID-19. *Immunity*, *53*(6), 1258-1271 e1255.  
700 <https://doi.org/10.1016/j.immuni.2020.11.016>
- 701 Bange, E. M., Han, N. A., Wileyto, P., Kim, J. Y., Gouma, S., Robinson, J., Greenplate, A. R., Hwee, M.  
702 A., Porterfield, F., Owoyemi, O., Naik, K., Zheng, C., Galantino, M., Weisman, A. R., Ittner, C.  
703 A. G., Kugler, E. M., Baxter, A. E., Oniyide, O., Agyekum, R. S., Dunn, T. G., Jones, T. K.,  
704 Giannini, H. M., Weirick, M. E., McAllister, C. M., Babady, N. E., Kumar, A., Widman, A. J.,  
705 DeWolf, S., Boutemine, S. R., Roberts, C., Budzik, K. R., Tollett, S., Wright, C., Perloff, T., Sun,  
706 L., Mathew, D., Giles, J. R., Oldridge, D. A., Wu, J. E., Alanio, C., Adamski, S., Garfall, A. L.,  
707 Vella, L. A., Kerr, S. J., Cohen, J. V., Oyer, R. A., Massa, R., Maillard, I. P., Maxwell, K. N., Reilly,  
708 J. P., Maslak, P. G., Vonderheide, R. H., Wolchok, J. D., Hensley, S. E., Wherry, E. J., Meyer, N.  
709 J., DeMichele, A. M., Vardhana, S. A., Mamtani, R., & Huang, A. C. (2021). CD8(+) T cells  
710 contribute to survival in patients with COVID-19 and hematologic cancer. *Nat Med*, *27*(7),  
711 1280-1289. <https://doi.org/10.1038/s41591-021-01386-7>
- 712 Bertoletti, A., Le Bert, N., Qui, M., & Tan, A. T. (2021). SARS-CoV-2-specific T cells in infection and  
713 vaccination. *Cell Mol Immunol*, *18*(10), 2307-2312. [https://doi.org/10.1038/s41423-021-](https://doi.org/10.1038/s41423-021-00743-3)  
714 [00743-3](https://doi.org/10.1038/s41423-021-00743-3)
- 715 Bijen, H. M., van der Steen, D. M., Hagedoorn, R. S., Wouters, A. K., Wooldridge, L., Falkenburg, J. H.  
716 F., & Heemskerk, M. H. M. (2018). Preclinical Strategies to Identify Off-Target Toxicity of  
717 High-Affinity TCRs. *Mol Ther*, *26*(5), 1206-1214.  
718 <https://doi.org/10.1016/j.ymthe.2018.02.017>
- 719 Birnbaum, M. E., Mendoza, J. L., Sethi, D. K., Dong, S., Glanville, J., Dobbins, J., Ozkan, E., Davis, M.  
720 M., Wucherpfennig, K. W., & Garcia, K. C. (2014). Deconstructing the peptide-MHC  
721 specificity of T cell recognition. *Cell*, *157*(5), 1073-1087.  
722 <https://doi.org/10.1016/j.cell.2014.03.047>
- 723 Bolotin, D. A., Poslavsky, S., Mitrophanov, I., Shugay, M., Mamedov, I. Z., Putintseva, E. V., &  
724 Chudakov, D. M. (2015). MiXCR: software for comprehensive adaptive immunity profiling.  
725 *Nat Methods*, *12*(5), 380-381. <https://doi.org/10.1038/nmeth.3364>

- 726 Braun, J., Loyal, L., Frentsch, M., Wendisch, D., Georg, P., Kurth, F., Hippenstiel, S., Dingeldej, M.,  
727 Kruse, B., Fauchere, F., Baysal, E., Mangold, M., Henze, L., Lauster, R., Mall, M. A., Beyer, K.,  
728 Rohmel, J., Voigt, S., Schmitz, J., Miltenyi, S., Demuth, I., Muller, M. A., Hocke, A.,  
729 Witznath, M., Suttrop, N., Kern, F., Reimer, U., Wenschuh, H., Drosten, C., Corman, V. M.,  
730 Giesecke-Thiel, C., Sander, L. E., & Thiel, A. (2020). SARS-CoV-2-reactive T cells in healthy  
731 donors and patients with COVID-19. *Nature*, 587(7833), 270-274.  
732 <https://doi.org/10.1038/s41586-020-2598-9>
- 733 Brodin, P. (2021). Immune determinants of COVID-19 disease presentation and severity. *Nat Med*,  
734 27(1), 28-33. <https://doi.org/10.1038/s41591-020-01202-8>
- 735 Cameron, B. J., Gerry, A. B., Dukes, J., Harper, J. V., Kannan, V., Bianchi, F. C., Grand, F., Brewer, J. E.,  
736 Gupta, M., Plesa, G., Bossi, G., Vuidepot, A., Powlesland, A. S., Legg, A., Adams, K. J., Bennett,  
737 A. D., Pumphrey, N. J., Williams, D. D., Binder-Scholl, G., Kulikovskaya, I., Levine, B. L., Riley, J.  
738 L., Varela-Rohena, A., Stadtmauer, E. A., Rapoport, A. P., Linette, G. P., June, C. H., Hassan, N.  
739 J., Kalos, M., & Jakobsen, B. K. (2013). Identification of a Titin-derived HLA-A1-presented  
740 peptide as a cross-reactive target for engineered MAGE A3-directed T cells. *Sci Transl Med*,  
741 5(197), 197ra103. <https://doi.org/10.1126/scitranslmed.3006034>
- 742 Chiappesi, F., Zaia, J. A., Faircloth, K., Johnson, D., Ly, M., Karpinski, V., La Rosa, C., Drake, J., Marcia,  
743 J., Acosta, A. M., Dempsey, S., Taplitz, R. A., Zhou, Q., Park, Y., Ortega Francisco, S.,  
744 Kaltcheva, T., Frankel, P. H., Rosen, S., Wussow, F., Dadwal, S., & Diamond, D. J. (2022).  
745 Vaccine-induced spike- and nucleocapsid-specific cellular responses maintain potent cross-  
746 reactivity to SARS-CoV-2 Delta and Omicron variants. *iScience*, 25(8), 104745.  
747 <https://doi.org/10.1016/j.isci.2022.104745>
- 748 Choi, S. J., Kim, D. U., Noh, J. Y., Kim, S., Park, S. H., Jeong, H. W., & Shin, E. C. (2022). T cell epitopes  
749 in SARS-CoV-2 proteins are substantially conserved in the Omicron variant. *Cell Mol*  
750 *Immunol*, 19(3), 447-448. <https://doi.org/10.1038/s41423-022-00838-5>
- 751 Clute, S. C., Watkin, L. B., Cornberg, M., Naumov, Y. N., Sullivan, J. L., Luzuriaga, K., Welsh, R. M., &  
752 Selin, L. K. (2005). Cross-reactive influenza virus-specific CD8+ T cells contribute to  
753 lymphoproliferation in Epstein-Barr virus-associated infectious mononucleosis. *J Clin Invest*,  
754 115(12), 3602-3612. <https://doi.org/10.1172/JCI25078>
- 755 Cole, D. K., Bulek, A. M., Dolton, G., Schauenberg, A. J., Szomolay, B., Rittase, W., Trimby, A.,  
756 Jothikumar, P., Fuller, A., Skowera, A., Rossjohn, J., Zhu, C., Miles, J. J., Peakman, M.,  
757 Wooldridge, L., Rizkallah, P. J., & Sewell, A. K. (2016). Hotspot autoimmune T cell receptor  
758 binding underlies pathogen and insulin peptide cross-reactivity. *J Clin Invest*, 126(9), 3626.  
759 <https://doi.org/10.1172/JCI89919>
- 760 Cornberg, M., Clute, S. C., Watkin, L. B., Saccoccio, F. M., Kim, S. K., Naumov, Y. N., Brehm, M. A.,  
761 Aslan, N., Welsh, R. M., & Selin, L. K. (2010). CD8 T cell cross-reactivity networks mediate  
762 heterologous immunity in human EBV and murine vaccinia virus infections. *J Immunol*,  
763 184(6), 2825-2838. <https://doi.org/10.4049/jimmunol.0902168>
- 764 Cusick, M. F., Libbey, J. E., & Fujinami, R. S. (2012). Molecular mimicry as a mechanism of  
765 autoimmune disease. *Clin Rev Allergy Immunol*, 42(1), 102-111.  
766 <https://doi.org/10.1007/s12016-011-8293-8>
- 767 10.1007/s12016-011-8294-7
- 768 Escobar, H., Crockett, D. K., Reyes-Vargas, E., Baena, A., Rockwood, A. L., Jensen, P. E., & Delgado, J.  
769 C. (2008). Large scale mass spectrometric profiling of peptides eluted from HLA molecules  
770 reveals N-terminal-extended peptide motifs. *J Immunol*, 181(7), 4874-4882.  
771 <https://doi.org/10.4049/jimmunol.181.7.4874>
- 772 Gao, Y., Cai, C., Grifoni, A., Muller, T. R., Niessl, J., Olofsson, A., Humbert, M., Hansson, L., Osterborg,  
773 A., Bergman, P., Chen, P., Olsson, A., Sandberg, J. K., Weiskopf, D., Price, D. A., Ljunggren, H.  
774 G., Karlsson, A. C., Sette, A., Aleman, S., & Buggert, M. (2022). Ancestral SARS-CoV-2-specific  
775 T cells cross-recognize the Omicron variant. *Nat Med*. [https://doi.org/10.1038/s41591-022-](https://doi.org/10.1038/s41591-022-01700-x)  
776 [01700-x](https://doi.org/10.1038/s41591-022-01700-x)

- 777 Gao, Z., Xu, Y., Sun, C., Wang, X., Guo, Y., Qiu, S., & Ma, K. (2021). A systematic review of  
778 asymptomatic infections with COVID-19. *J Microbiol Immunol Infect*, *54*(1), 12-16.  
779 <https://doi.org/10.1016/j.jmii.2020.05.001>
- 780 GeurtsvanKessel, C. H., Geers, D., Schmitz, K. S., Mykytyn, A. Z., Lamers, M. M., Bogers, S.,  
781 Scherbeijn, S., Gommers, L., Sablerolles, R. S. G., Nieuwkoop, N. N., Rijsbergen, L. C., van Dijk,  
782 L. L. A., de Wilde, J., Alblas, K., Breugem, T. I., Rijnders, B. J. A., de Jager, H., Weiskopf, D., van  
783 der Kuy, P. H. M., Sette, A., Koopmans, M. P. G., Grifoni, A., Haagmans, B. L., & de Vries, R. D.  
784 (2022). Divergent SARS CoV-2 Omicron-reactive T- and B cell responses in COVID-19 vaccine  
785 recipients. *Sci Immunol*, eabo2202. <https://doi.org/10.1126/sciimmunol.abo2202>
- 786 Grifoni, A., Weiskopf, D., Ramirez, S. I., Mateus, J., Dan, J. M., Moderbacher, C. R., Rawlings, S. A.,  
787 Sutherland, A., Premkumar, L., Jadi, R. S., Marrama, D., de Silva, A. M., Frazier, A., Carlin, A.  
788 F., Greenbaum, J. A., Peters, B., Krammer, F., Smith, D. M., Crotty, S., & Sette, A. (2020).  
789 Targets of T Cell Responses to SARS-CoV-2 Coronavirus in Humans with COVID-19 Disease  
790 and Unexposed Individuals. *Cell*, *181*(7), 1489-1501 e1415.  
791 <https://doi.org/10.1016/j.cell.2020.05.015>
- 792 Hombrink, P., Raz, Y., Kester, M. G., de Boer, R., Weissbrich, B., von dem Borne, P. A., Busch, D. H.,  
793 Schumacher, T. N., Falkenburg, J. H., & Heemskerk, M. H. (2013). Mixed functional  
794 characteristics correlating with TCR-ligand koff -rate of MHC-tetramer reactive T cells within  
795 the naive T-cell repertoire. *Eur J Immunol*, *43*(11), 3038-3050.  
796 <https://doi.org/10.1002/eji.201343397>
- 797 Jahn, L., Hombrink, P., Hassan, C., Kester, M. G., van der Steen, D. M., Hagedoorn, R. S., Falkenburg,  
798 J. H., van Veelen, P. A., & Heemskerk, M. H. (2015). Therapeutic targeting of the BCR-  
799 associated protein CD79b in a TCR-based approach is hampered by aberrant expression of  
800 CD79b. *Blood*, *125*(6), 949-958. <https://doi.org/10.1182/blood-2014-07-587840>
- 801 Jo, N., Zhang, R., Ueno, H., Yamamoto, T., Weiskopf, D., Nagao, M., Yamanaka, S., & Hamazaki, Y.  
802 (2021). Aging and CMV Infection Affect Pre-existing SARS-CoV-2-Reactive CD8+ T Cells in  
803 Unexposed Individuals [Original Research]. *Frontiers in Aging*, *2*.  
804 <https://doi.org/10.3389/fragi.2021.719342>
- 805 Johansson, A. M., Malhotra, U., Kim, Y. G., Gomez, R., Krist, M. P., Wald, A., Koelle, D. M., & Kwok,  
806 W. W. (2021). Cross-reactive and mono-reactive SARS-CoV-2 CD4+ T cells in prepandemic  
807 and COVID-19 convalescent individuals. *PLoS Pathog*, *17*(12), e1010203.  
808 <https://doi.org/10.1371/journal.ppat.1010203>
- 809 Jung, M. K., Jeong, S. D., Noh, J. Y., Kim, D.-U., Jung, S., Song, J. Y., Jeong, H. W., Park, S.-H., & Shin,  
810 E.-C. (2022). BNT162b2-induced memory T cells respond to the Omicron variant with  
811 preserved polyfunctionality. *Nature Microbiology*, *7*(6), 909-917.
- 812 Keeton, R., Tincho, M. B., Ngomti, A., Baguma, R., Benede, N., Suzuki, A., Khan, K., Cele, S., Bernstein,  
813 M., Karim, F., Madzorera, S. V., Moyo-Gwete, T., Mennen, M., Skelem, S., Adriaanse, M.,  
814 Mutithu, D., Aremu, O., Stek, C., du Bruyn, E., Van Der Mescht, M. A., de Beer, Z., de Villiers,  
815 T. R., Bodenstein, A., van den Berg, G., Mendes, A., Strydom, A., Venter, M., Giandhari, J.,  
816 Naidoo, Y., Pillay, S., Tegally, H., Grifoni, A., Weiskopf, D., Sette, A., Wilkinson, R. J., de  
817 Oliveira, T., Bekker, L. G., Gray, G., Ueckermann, V., Rossouw, T., Boswell, M. T., Bihman, J.,  
818 Moore, P. L., Sigal, A., Ntusi, N. A. B., Burgers, W. A., & Riou, C. (2022). T cell responses to  
819 SARS-CoV-2 spike cross-recognize Omicron. *Nature*. [https://doi.org/10.1038/s41586-022-](https://doi.org/10.1038/s41586-022-04460-3)  
820 [04460-3](https://doi.org/10.1038/s41586-022-04460-3)
- 821 Klarenbeek, P. L., Remmerswaal, E. B., ten Berge, I. J., Doorenspleet, M. E., van Schaik, B. D., Esveldt,  
822 R. E., Koch, S. D., ten Brinke, A., van Kampen, A. H., Bemelman, F. J., Tak, P. P., Baas, F., de  
823 Vries, N., & van Lier, R. A. (2012). Deep sequencing of antiviral T-cell responses to HCMV and  
824 EBV in humans reveals a stable repertoire that is maintained for many years. *PLoS Pathog*,  
825 *8*(9), e1002889. <https://doi.org/10.1371/journal.ppat.1002889>
- 826 Koning, M. T., Kielbasa, S. M., Boersma, V., Buermans, H. P. J., van der Zeeuw, S. A. J., van Bergen, C.  
827 A. M., Cleven, A. H. G., Kluin, P. M., Griffioen, M., Navarrete, M. A., & Veelken, H. (2017).



- 828 ARTISAN PCR: rapid identification of full-length immunoglobulin rearrangements without  
829 primer binding bias. *Br J Haematol*, 178(6), 983-986. <https://doi.org/10.1111/bjh.14180>
- 830 Kundu, R., Narean, J. S., Wang, L., Fenn, J., Pillay, T., Fernandez, N. D., Conibear, E., Koycheva, A.,  
831 Davies, M., Tolosa-Wright, M., Hakki, S., Varro, R., McDermott, E., Hammett, S., Cutajar, J.,  
832 Thwaites, R. S., Parker, E., Rosadas, C., McClure, M., Tedder, R., Taylor, G. P., Dunning, J., &  
833 Lalvani, A. (2022). Cross-reactive memory T cells associate with protection against SARS-CoV-  
834 2 infection in COVID-19 contacts. *Nat Commun*, 13(1), 80. [https://doi.org/10.1038/s41467-  
835 021-27674-x](https://doi.org/10.1038/s41467-021-27674-x)
- 836 Le Bert, N., Tan, A. T., Kunasegaran, K., Tham, C. Y. L., Hafezi, M., Chia, A., Chng, M. H. Y., Lin, M.,  
837 Tan, N., Linster, M., Chia, W. N., Chen, M. I., Wang, L. F., Ooi, E. E., Kalimuddin, S., Tambyah,  
838 P. A., Low, J. G., Tan, Y. J., & Bertoletti, A. (2020). SARS-CoV-2-specific T cell immunity in  
839 cases of COVID-19 and SARS, and uninfected controls. *Nature*, 584(7821), 457-462.  
840 <https://doi.org/10.1038/s41586-020-2550-z>
- 841 Lee, C. H., Salio, M., Napolitani, G., Ogg, G., Simmons, A., & Koohy, H. (2020). Predicting Cross-  
842 Reactivity and Antigen Specificity of T Cell Receptors. *Front Immunol*, 11, 565096.  
843 <https://doi.org/10.3389/fimmu.2020.565096>
- 844 Liao, M., Liu, Y., Yuan, J., Wen, Y., Xu, G., Zhao, J., Cheng, L., Li, J., Wang, X., Wang, F., Liu, L., Amit, I.,  
845 Zhang, S., & Zhang, Z. (2020). Single-cell landscape of bronchoalveolar immune cells in  
846 patients with COVID-19. *Nat Med*, 26(6), 842-844. [https://doi.org/10.1038/s41591-020-  
847 0901-9](https://doi.org/10.1038/s41591-020-0901-9)
- 848 Lineburg, K. E., Grant, E. J., Swaminathan, S., Chatzileontiadou, D. S. M., Szeto, C., Sloane, H.,  
849 Panikkar, A., Raju, J., Crooks, P., Rehan, S., Nguyen, A. T., Lekieffre, L., Neller, M. A., Tong, Z.  
850 W. M., Jayasinghe, D., Chew, K. Y., Lobos, C. A., Halim, H., Burrows, J. M., Riboldi-Tunncliffe,  
851 A., Chen, W., D'Orsogna, L., Khanna, R., Short, K. R., Smith, C., & Gras, S. (2021). CD8(+) T  
852 cells specific for an immunodominant SARS-CoV-2 nucleocapsid epitope cross-react with  
853 selective seasonal coronaviruses. *Immunity*, 54(5), 1055-1065 e1055.  
854 <https://doi.org/10.1016/j.immuni.2021.04.006>
- 855 Liu, J., Chandrashekar, A., Sellers, D., Barrett, J., Jacob-Dolan, C., Lifton, M., McMahan, K., Sciacca,  
856 M., VanWyk, H., Wu, C., Yu, J., Collier, A. Y., & Barouch, D. H. (2022). Vaccines Elicit Highly  
857 Conserved Cellular Immunity to SARS-CoV-2 Omicron. *Nature*.  
858 <https://doi.org/10.1038/s41586-022-04465-y>
- 859 Loyal, L., Braun, J., Henze, L., Kruse, B., Dingeldey, M., Reimer, U., Kern, F., Schwarz, T., Mangold, M.,  
860 Unger, C., Dorfler, F., Kadler, S., Rosowski, J., Gurcan, K., Uyar-Aydin, Z., Frentsch, M., Kurth,  
861 F., Schnatbaum, K., Eckey, M., Hippenstiel, S., Hocke, A., Muller, M. A., Sawitzki, B., Miltenyi,  
862 S., Paul, F., Mall, M. A., Wenschuh, H., Voigt, S., Drosten, C., Lauster, R., Lachman, N., Sander,  
863 L. E., Corman, V. M., Rohmel, J., Meyer-Arndt, L., Thiel, A., & Giesecke-Thiel, C. (2021). Cross-  
864 reactive CD4(+) T cells enhance SARS-CoV-2 immune responses upon infection and  
865 vaccination. *Science*, 374(6564), eabh1823. <https://doi.org/10.1126/science.abh1823>
- 866 Macdonald, W. A., Chen, Z., Gras, S., Archbold, J. K., Tynan, F. E., Clements, C. S., Bharadwaj, M.,  
867 Kjer-Nielsen, L., Saunders, P. M., Wilce, M. C., Crawford, F., Stadinsky, B., Jackson, D., Brooks,  
868 A. G., Purcell, A. W., Kappler, J. W., Burrows, S. R., Rossjohn, J., & McCluskey, J. (2009). T cell  
869 allorecognition via molecular mimicry. *Immunity*, 31(6), 897-908.  
870 <https://doi.org/10.1016/j.immuni.2009.09.025>
- 871 Mateus, J., Grifoni, A., Tarke, A., Sidney, J., Ramirez, S. I., Dan, J. M., Burger, Z. C., Rawlings, S. A.,  
872 Smith, D. M., Phillips, E., Mallal, S., Lammers, M., Rubiro, P., Quiambao, L., Sutherland, A.,  
873 Yu, E. D., da Silva Antunes, R., Greenbaum, J., Frazier, A., Markmann, A. J., Premkumar, L., de  
874 Silva, A., Peters, B., Crotty, S., Sette, A., & Weiskopf, D. (2020). Selective and cross-reactive  
875 SARS-CoV-2 T cell epitopes in unexposed humans. *Science*, 370(6512), 89-94.  
876 <https://doi.org/10.1126/science.abd3871>
- 877 Meckiff, B. J., Ramirez-Suastegui, C., Fajardo, V., Chee, S. J., Kusnadi, A., Simon, H., Eschweiler, S.,  
878 Grifoni, A., Pelosi, E., Weiskopf, D., Sette, A., Ay, F., Seumois, G., Ottensmeier, C. H., &

- 879 Vijayanand, P. (2020). Imbalance of Regulatory and Cytotoxic SARS-CoV-2-Reactive CD4(+) T  
880 Cells in COVID-19. *Cell*, *183*(5), 1340-1353 e1316. <https://doi.org/10.1016/j.cell.2020.10.001>
- 881 Morton, L. T., Reijmers, R. M., Wouters, A. K., Kweekel, C., Remst, D. F. G., Pothast, C. R., Falkenburg,  
882 J. H. F., & Heemskerk, M. H. M. (2020). Simultaneous Deletion of Endogenous TCRalpha  
883 for TCR Gene Therapy Creates an Improved and Safe Cellular Therapeutic. *Mol Ther*, *28*(1),  
884 64-74. <https://doi.org/10.1016/j.ymthe.2019.10.001>
- 885 Nelde, A., Bilich, T., Heitmann, J. S., Maringer, Y., Salih, H. R., Roerden, M., Lubke, M., Bauer, J.,  
886 Rieth, J., Wacker, M., Peter, A., Horber, S., Traenkle, B., Kaiser, P. D., Rothbauer, U., Becker,  
887 M., Junker, D., Krause, G., Strengert, M., Schneiderhan-Marra, N., Templin, M. F., Joos, T. O.,  
888 Kowalewski, D. J., Stos-Zweifel, V., Fehr, M., Rabsteyn, A., Mirakaj, V., Karbach, J., Jager, E.,  
889 Graf, M., Gruber, L. C., Rachfalski, D., Preuss, B., Hagelstein, I., Marklin, M., Bakchoul, T.,  
890 Gouttefangeas, C., Kohlbacher, O., Klein, R., Stevanovic, S., Rammensee, H. G., & Walz, J. S.  
891 (2021). SARS-CoV-2-derived peptides define heterologous and COVID-19-induced T cell  
892 recognition. *Nat Immunol*, *22*(1), 74-85. <https://doi.org/10.1038/s41590-020-00808-x>
- 893 Nguyen, A. T., Szeto, C., Jayasinghe, D., Lobos, C. A., Halim, H., Chatzileontiadou, D. S. M., Grant, E. J.,  
894 & Gras, S. (2021). SARS-CoV-2 Spike-Derived Peptides Presented by HLA Molecules.  
895 *Biophysica*, *1*(2), 194-203. <https://www.mdpi.com/2673-4125/1/2/15>
- 896 Pellicci, D. G., Uldrich, A. P., Le Nours, J., Ross, F., Chabrol, E., Eckle, S. B., de Boer, R., Lim, R. T.,  
897 McPherson, K., Besra, G., Howell, A. R., Moretta, L., McCluskey, J., Heemskerk, M. H., Gras,  
898 S., Rossjohn, J., & Godfrey, D. I. (2014). The molecular bases of delta/alpha T cell-  
899 mediated antigen recognition. *J Exp Med*, *211*(13), 2599-2615.  
900 <https://doi.org/10.1084/jem.20141764>
- 901 Peng, Y., Mentzer, A. J., Liu, G., Yao, X., Yin, Z., Dong, D., Dejnirattisai, W., Rostron, T., Supasa, P., Liu,  
902 C., Lopez-Camacho, C., Slon-Campos, J., Zhao, Y., Stuart, D. I., Paesen, G. C., Grimes, J. M.,  
903 Antson, A. A., Bayfield, O. W., Hawkins, D., Ker, D. S., Wang, B., Turtle, L., Subramaniam, K.,  
904 Thomson, P., Zhang, P., Dold, C., Ratcliff, J., Simmonds, P., de Silva, T., Sopp, P., Wellington,  
905 D., Rajapaksa, U., Chen, Y. L., Salio, M., Napolitani, G., Paes, W., Borrow, P., Kessler, B. M.,  
906 Fry, J. W., Schwabe, N. F., Semple, M. G., Baillie, J. K., Moore, S. C., Openshaw, P. J. M.,  
907 Ansari, M. A., Dunachie, S., Barnes, E., Frater, J., Kerr, G., Goulder, P., Lockett, T., Levin, R.,  
908 Zhang, Y., Jing, R., Ho, L. P., Oxford Immunology Network Covid-19 Response, T. c. C.,  
909 Investigators, I. C., Cornall, R. J., Conlon, C. P., Klenerman, P., Sreaton, G. R.,  
910 Mongkolsapaya, J., McMichael, A., Knight, J. C., Ogg, G., & Dong, T. (2020). Broad and strong  
911 memory CD4(+) and CD8(+) T cells induced by SARS-CoV-2 in UK convalescent individuals  
912 following COVID-19. *Nat Immunol*, *21*(11), 1336-1345. [https://doi.org/10.1038/s41590-020-](https://doi.org/10.1038/s41590-020-0782-6)  
913 [0782-6](https://doi.org/10.1038/s41590-020-0782-6)
- 914 Picelli, S., Bjorklund, A. K., Faridani, O. R., Sagasser, S., Winberg, G., & Sandberg, R. (2013). Smart-  
915 seq2 for sensitive full-length transcriptome profiling in single cells. *Nat Methods*, *10*(11),  
916 1096-1098. <https://doi.org/10.1038/nmeth.2639>
- 917 Piepenbrink, K. H., Blevins, S. J., Scott, D. R., & Baker, B. M. (2013). The basis for limited specificity  
918 and MHC restriction in a T cell receptor interface. *Nat Commun*, *4*, 1948.  
919 <https://doi.org/10.1038/ncomms2948>
- 920 Price, D. A., Brenchley, J. M., Ruff, L. E., Betts, M. R., Hill, B. J., Roederer, M., Koup, R. A., Migueles, S.  
921 A., Gostick, E., Wooldridge, L., Sewell, A. K., Connors, M., & Douek, D. C. (2005). Avidity for  
922 antigen shapes clonal dominance in CD8+ T cell populations specific for persistent DNA  
923 viruses. *J Exp Med*, *202*(10), 1349-1361. <https://doi.org/10.1084/jem.20051357>
- 924 Redd, A. D., Nardin, A., Kared, H., Bloch, E. M., Abel, B., Pekosz, A., Laeyendecker, O., Fehlings, M.,  
925 Quinn, T. C., & Tobian, A. A. R. (2022). Minimal Crossover between Mutations Associated  
926 with Omicron Variant of SARS-CoV-2 and CD8(+) T-Cell Epitopes Identified in COVID-19  
927 Convalescent Individuals. *mbio*, *13*(2), e0361721. <https://doi.org/10.1128/mbio.03617-21>
- 928 Riley, T. P., Hellman, L. M., Gee, M. H., Mendoza, J. L., Alonso, J. A., Foley, K. C., Nishimura, M. I.,  
929 Vander Kooi, C. W., Garcia, K. C., & Baker, B. M. (2018). T cell receptor cross-reactivity

- 930 expanded by dramatic peptide-MHC adaptability. *Nat Chem Biol*, 14(10), 934-942.  
931 <https://doi.org/10.1038/s41589-018-0130-4>
- 932 Roukens, A. H. E., Pothast, C. R., Konig, M., Huisman, W., Dalebout, T., Tak, T., Azimi, S., Kruize, Y.,  
933 Hagedoorn, R. S., Zlei, M., Staal, F. J. T., de Bie, F. J., van Dongen, J. J. M., Arbous, S. M.,  
934 Zhang, J. L. H., Verheij, M., Prins, C., van der Does, A. M., Hiemstra, P. S., de Vries, J. J. C.,  
935 Janse, J. J., Roestenberg, M., Myeni, S. K., Kikkert, M., Yazdanbakhsh, M., Heemskerk, M. H.  
936 M., Smits, H. H., Jochems, S. P., in collaboration with, B.-C. g., & in collaboration with, C.-L. g.  
937 (2022). Prolonged activation of nasal immune cell populations and development of tissue-  
938 resident SARS-CoV-2-specific CD8(+) T cell responses following COVID-19. *Nat Immunol*,  
939 23(1), 23-32. <https://doi.org/10.1038/s41590-021-01095-w>
- 940 Rydzynski Moderbacher, C., Ramirez, S. I., Dan, J. M., Grifoni, A., Hastie, K. M., Weiskopf, D.,  
941 Belanger, S., Abbott, R. K., Kim, C., Choi, J., Kato, Y., Crotty, E. G., Kim, C., Rawlings, S. A.,  
942 Mateus, J., Tse, L. P. V., Frazier, A., Baric, R., Peters, B., Greenbaum, J., Ollmann Saphire, E.,  
943 Smith, D. M., Sette, A., & Crotty, S. (2020). Antigen-Specific Adaptive Immunity to SARS-CoV-  
944 2 in Acute COVID-19 and Associations with Age and Disease Severity. *Cell*, 183(4), 996-1012  
945 e1019. <https://doi.org/10.1016/j.cell.2020.09.038>
- 946 Salgado-Benvindo, C., Thaler, M., Tas, A., Ogando, N. S., Bredenbeek, P. J., Ninaber, D. K., Wang, Y.,  
947 Hiemstra, P. S., Snijder, E. J., & van Hemert, M. J. (2020). Suramin Inhibits SARS-CoV-2  
948 Infection in Cell Culture by Interfering with Early Steps of the Replication Cycle. *Antimicrobial*  
949 *Agents and Chemotherapy*, 64(8). <https://doi.org/ARTN e00900-20>
- 950 10.1128/AAC.00900-20
- 951 Schober, K., Buchholz, V. R., & Busch, D. H. (2018). TCR repertoire evolution during maintenance of  
952 CMV-specific T-cell populations. *Immunol Rev*, 283(1), 113-128.  
953 <https://doi.org/10.1111/imr.12654>
- 954 Schrodinger, LLC. (2015). *The PyMOL Molecular Graphics System, Version 1.8*.
- 955 Sekine, T., Perez-Potti, A., Rivera-Ballesteros, O., Stralin, K., Gorin, J. B., Olsson, A., Llewellyn-Lacey,  
956 S., Kamal, H., Bogdanovic, G., Muschiol, S., Wullimann, D. J., Kammann, T., Emgard, J., Parrot,  
957 T., Folkesson, E., Karolinska, C.-S. G., Rooyackers, O., Eriksson, L. I., Henter, J. I., Sonnerborg,  
958 A., Allander, T., Albert, J., Nielsen, M., Klingstrom, J., Gredmark-Russ, S., Bjorkstrom, N. K.,  
959 Sandberg, J. K., Price, D. A., Ljunggren, H. G., Aleman, S., & Buggert, M. (2020). Robust T Cell  
960 Immunity in Convalescent Individuals with Asymptomatic or Mild COVID-19. *Cell*, 183(1),  
961 158-168 e114. <https://doi.org/10.1016/j.cell.2020.08.017>
- 962 Sette, A., & Crotty, S. (2021). Adaptive immunity to SARS-CoV-2 and COVID-19. *Cell*, 184(4), 861-880.  
963 <https://doi.org/10.1016/j.cell.2021.01.007>
- 964 Shomuradova, A. S., Vagida, M. S., Sheetikov, S. A., Zornikova, K. V., Kiryukhin, D., Titov, A.,  
965 Peshkova, I. O., Khmelevskaya, A., Dianov, D. V., Malasheva, M., Shmelev, A., Serdyuk, Y.,  
966 Bagaev, D. V., Pivnyuk, A., Shcherbinin, D. S., Maleeva, A. V., Shakirova, N. T., Pilunov, A.,  
967 Malko, D. B., Khamaganova, E. G., Biderman, B., Ivanov, A., Shugay, M., & Efimov, G. A.  
968 (2020). SARS-CoV-2 Epitopes Are Recognized by a Public and Diverse Repertoire of Human T  
969 Cell Receptors. *Immunity*, 53(6), 1245-1257 e1245.  
970 <https://doi.org/10.1016/j.immuni.2020.11.004>
- 971 Steiner, S., Schwarz, T., Corman, V. M., Sotzny, F., Bauer, S., Drosten, C., Volk, H. D., Scheibenbogen,  
972 C., & Hanitsch, L. G. (2021). Reactive T Cells in Convalescent COVID-19 Patients With  
973 Negative SARS-CoV-2 Antibody Serology. *Front Immunol*, 12, 687449.  
974 <https://doi.org/10.3389/fimmu.2021.687449>
- 975 Stervbo, U., Rahmann, S., Roch, T., Westhoff, T. H., & Babel, N. (2020). Epitope similarity cannot  
976 explain the pre-formed T cell immunity towards structural SARS-CoV-2 proteins. *Sci Rep*,  
977 10(1), 18995. <https://doi.org/10.1038/s41598-020-75972-z>
- 978 Su, L. F., & Davis, M. M. (2013). Antiviral memory phenotype T cells in unexposed adults. *Immunol*  
979 *Rev*, 255(1), 95-109. <https://doi.org/10.1111/imr.12095>

- 980 Sylwester, A. W., Mitchell, B. L., Edgar, J. B., Taormina, C., Pelte, C., Ruchti, F., Sleath, P. R.,  
981 Grabstein, K. H., Hosken, N. A., Kern, F., Nelson, J. A., & Picker, L. J. (2005). Broadly targeted  
982 human cytomegalovirus-specific CD4+ and CD8+ T cells dominate the memory  
983 compartments of exposed subjects. *J Exp Med*, 202(5), 673-685.  
984 <https://doi.org/10.1084/jem.20050882>
- 985 Szeto, C., Lobos, C. A., Nguyen, A. T., & Gras, S. (2020). TCR Recognition of Peptide-MHC-I: Rule  
986 Makers and Breakers. *Int J Mol Sci*, 22(1). <https://doi.org/10.3390/ijms22010068>
- 987 Szomolay, B., Liu, J., Brown, P. E., Miles, J. J., Clement, M., Llewellyn-Lacey, S., Dolton, G., Ekeruche-  
988 Makinde, J., Lissina, A., Schauenburg, A. J., Sewell, A. K., Burrows, S. R., Roederer, M., Price,  
989 D. A., Wooldridge, L., & van den Berg, H. A. (2016). Identification of human viral protein-  
990 derived ligands recognized by individual MHCI-restricted T-cell receptors. *Immunol Cell Biol*,  
991 94(6), 573-582. <https://doi.org/10.1038/icb.2016.12>
- 992 Tan, A. T., Linster, M., Tan, C. W., Le Bert, N., Chia, W. N., Kunasegaran, K., Zhuang, Y., Tham, C. Y. L.,  
993 Chia, A., Smith, G. J. D., Young, B., Kalimuddin, S., Low, J. G. H., Lye, D., Wang, L. F., &  
994 Bertoletti, A. (2021). Early induction of functional SARS-CoV-2-specific T cells associates with  
995 rapid viral clearance and mild disease in COVID-19 patients. *Cell Rep*, 34(6), 108728.  
996 <https://doi.org/10.1016/j.celrep.2021.108728>
- 997 Tan, C. C. S., Owen, C. J., Tham, C. Y. L., Bertoletti, A., van Dorp, L., & Balloux, F. (2021). Pre-existing T  
998 cell-mediated cross-reactivity to SARS-CoV-2 cannot solely be explained by prior exposure to  
999 endemic human coronaviruses. *Infect Genet Evol*, 95, 105075.  
1000 <https://doi.org/10.1016/j.meegid.2021.105075>
- 1001 Tarke, A., Coelho, C. H., Zhang, Z., Dan, J. M., Yu, E. D., Methot, N., Bloom, N. I., Goodwin, B., Phillips,  
1002 E., Mallal, S., Sidney, J., Filaci, G., Weiskopf, D., da Silva Antunes, R., Crotty, S., Grifoni, A., &  
1003 Sette, A. (2022). SARS-CoV-2 vaccination induces immunological T cell memory able to cross-  
1004 recognize variants from Alpha to Omicron. *Cell*. <https://doi.org/10.1016/j.cell.2022.01.015>
- 1005 Tarke, A., Sidney, J., Kidd, C. K., Dan, J. M., Ramirez, S. I., Yu, E. D., Mateus, J., da Silva Antunes, R.,  
1006 Moore, E., Rubiro, P., Methot, N., Phillips, E., Mallal, S., Frazier, A., Rawlings, S. A.,  
1007 Greenbaum, J. A., Peters, B., Smith, D. M., Crotty, S., Weiskopf, D., Grifoni, A., & Sette, A.  
1008 (2021). Comprehensive analysis of T cell immunodominance and immunoprevalence of  
1009 SARS-CoV-2 epitopes in COVID-19 cases. *Cell Rep Med*, 2(2), 100204.  
1010 <https://doi.org/10.1016/j.xcrm.2021.100204>
- 1011 Weber, S., Kehl, V., Erber, J., Wagner, K. I., Jetzlsperger, A. M., Burrell, T., Schober, K., Schommers,  
1012 P., Augustin, M., Crowell, C. S., Gerhard, M., Winter, C., Moosmann, A., Spinner, C. D.,  
1013 Protzer, U., Hoffmann, D., D'Ippolito, E., & Busch, D. H. (2022). CMV seropositivity is a  
1014 potential novel risk factor for severe COVID-19 in non-geriatric patients. *PLoS One*, 17(5),  
1015 e0268530. <https://doi.org/10.1371/journal.pone.0268530>
- 1016 Weiskopf, D., Schmitz, K. S., Raadsen, M. P., Grifoni, A., Okba, N. M. A., Endeman, H., van den Akker,  
1017 J. P. C., Molenkamp, R., Koopmans, M. P. G., van Gorp, E. C. M., Haagmans, B. L., de Swart, R.  
1018 L., Sette, A., & de Vries, R. D. (2020). Phenotype and kinetics of SARS-CoV-2-specific T cells in  
1019 COVID-19 patients with acute respiratory distress syndrome. *Sci Immunol*, 5(48).  
1020 <https://doi.org/10.1126/sciimmunol.abd2071>
- 1021 Wooldridge, L. (2013). Individual MHCI-Restricted T-Cell Receptors are Characterized by a Unique  
1022 Peptide Recognition Signature. *Front Immunol*, 4, 199.  
1023 <https://doi.org/10.3389/fimmu.2013.00199>
- 1024 Wooldridge, L., Laugel, B., Ekeruche, J., Clement, M., van den Berg, H. A., Price, D. A., & Sewell, A. K.  
1025 (2010). CD8 controls T cell cross-reactivity. *J Immunol*, 185(8), 4625-4632.  
1026 <https://doi.org/10.4049/jimmunol.1001480>
- 1027 Zuhair, M., Smit, G. S. A., Wallis, G., Jabbar, F., Smith, C., Devleeschauwer, B., & Griffiths, P. (2019).  
1028 Estimation of the worldwide seroprevalence of cytomegalovirus: A systematic review and  
1029 meta-analysis. *Rev Med Virol*, 29(3), e2034. <https://doi.org/10.1002/rmv.2034>

1030

1031

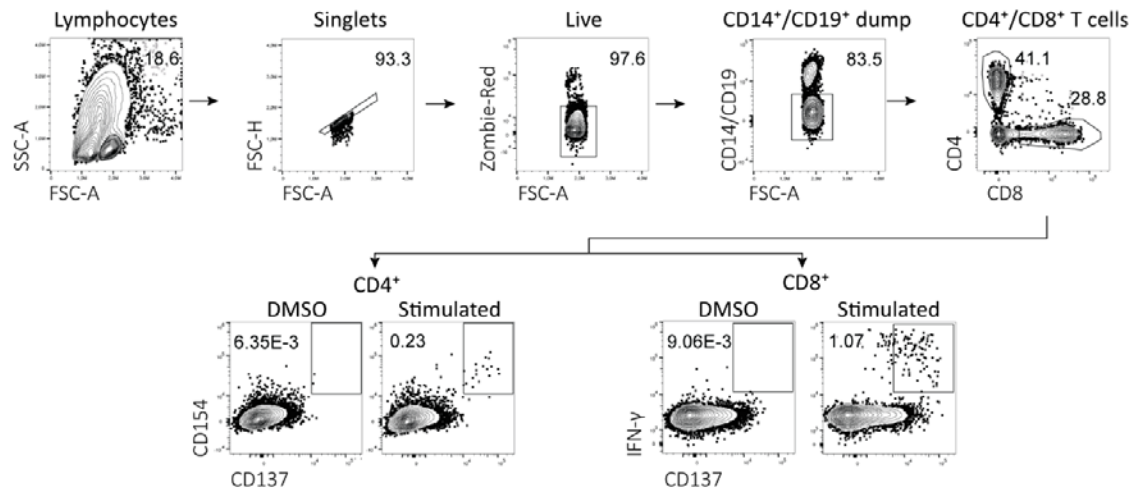

1033

**Figure 1 - figure supplement 1** Flow cytometry gating example for peptide stimulation assays

1034

Representative example of flow cytometry gating strategy for peptide-reactive CD4<sup>+</sup> and CD8<sup>+</sup> T

1035

cells. All events were gated on lymphocytes, single cells, viable cells, CD14 and CD19 negative

1036

and either CD4 or CD8 positive. For CD4<sup>+</sup> T cells, activation was measured by upregulation of

1037

CD137 and CD154 compared to DMSO. For CD8<sup>+</sup> T cells, activation was measured by

1038

upregulation of CD137 and IFN- $\gamma$  production compared to DMSO.

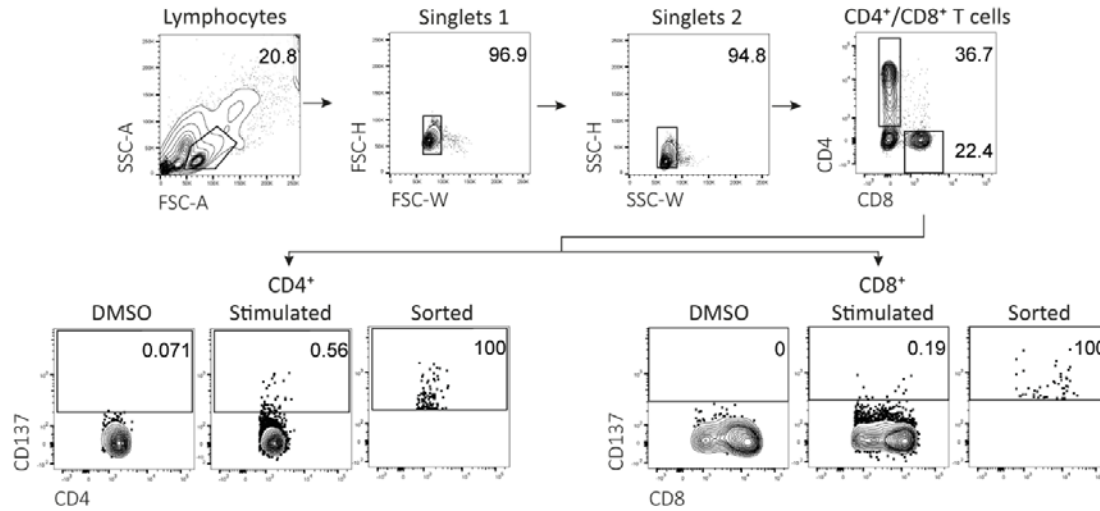

1039

1040 **Figure 2 - figure supplement 1** Flow-activated cell sorting gating example for peptide  
 1041 stimulation assays

1042 Representative example of fluorescent-activated cell sorting for peptide-reactive CD4<sup>+</sup> and CD8<sup>+</sup>  
 1043 T cells. All events were gated on lymphocytes, single cells and subsequently selected for CD4  
 1044 positive or CD8 positive cells. Activated CD4<sup>+</sup> or CD8<sup>+</sup> T cells were sorted based on increased  
 1045 expression of CD137 compared to DMSO.

1046

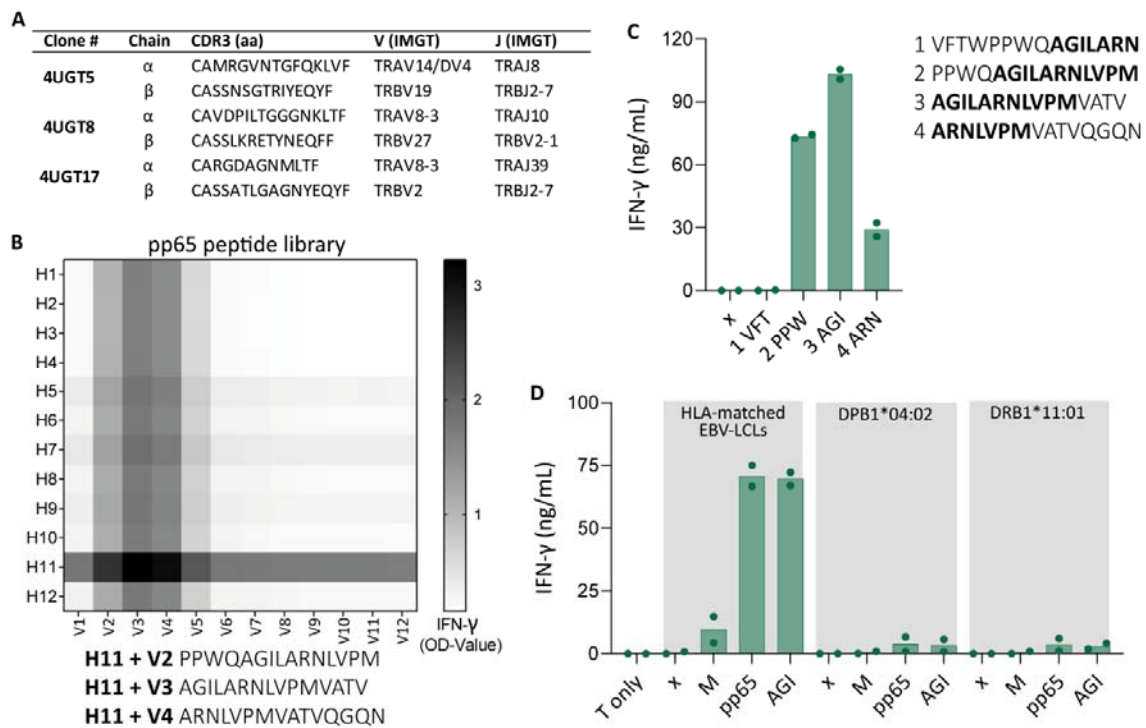

1047

1048

**Figure 2 - figure supplement 2** TCR sequence and pp65 peptide identification of 4UGT8 clone

1049 A) Figure showing T cell receptor sequencing of 3 cross-reactive CD4<sup>+</sup> T cell clones. B) Heatmap  
1050 showing reactivity of 4UGT8 clone after co-culturing with HLA-matched EBV-LCLs and CMV  
1051 pp65 peptide library which consisted of 12 horizontal (H1-H12) and 12 vertical sub pools (V1-  
1052 V12). Reactivity was measured by IFN- $\gamma$  ELISA of the supernatant, depicted as OD-value.  
1053 Peptides that were present in the sub pools with highest reactivity are shown below the figure. C)  
1054 Bar graphs showing IFN- $\gamma$  secretion after co-culturing 4UGT8 clone with single peptides. Peptide  
1055 sequences are depicted next to the figure with amino acid overlap between the peptides in bold.  
1056 Data points are technical duplicates. D) Bar graphs showing ELISA measurement of secreted  
1057 IFN- $\gamma$  after co-culturing of 4UGT8 clone with HLA-matched EBV-LCLs, or HLA-mismatched EBV-  
1058 LCLs transduced with HLA-DPB1\*04:02 or DRB1\*11:01. Stimulator cells were peptide-pulsed  
1059 with membrane (M) peptide pool, pp65 peptide pool or AGILARNLVPM (AGI) peptide. Data  
1060 points are experimental duplicates. Black arrows indicate that values were above plateau value  
1061 of the ELISA calibration curve.

1062

1063

1064

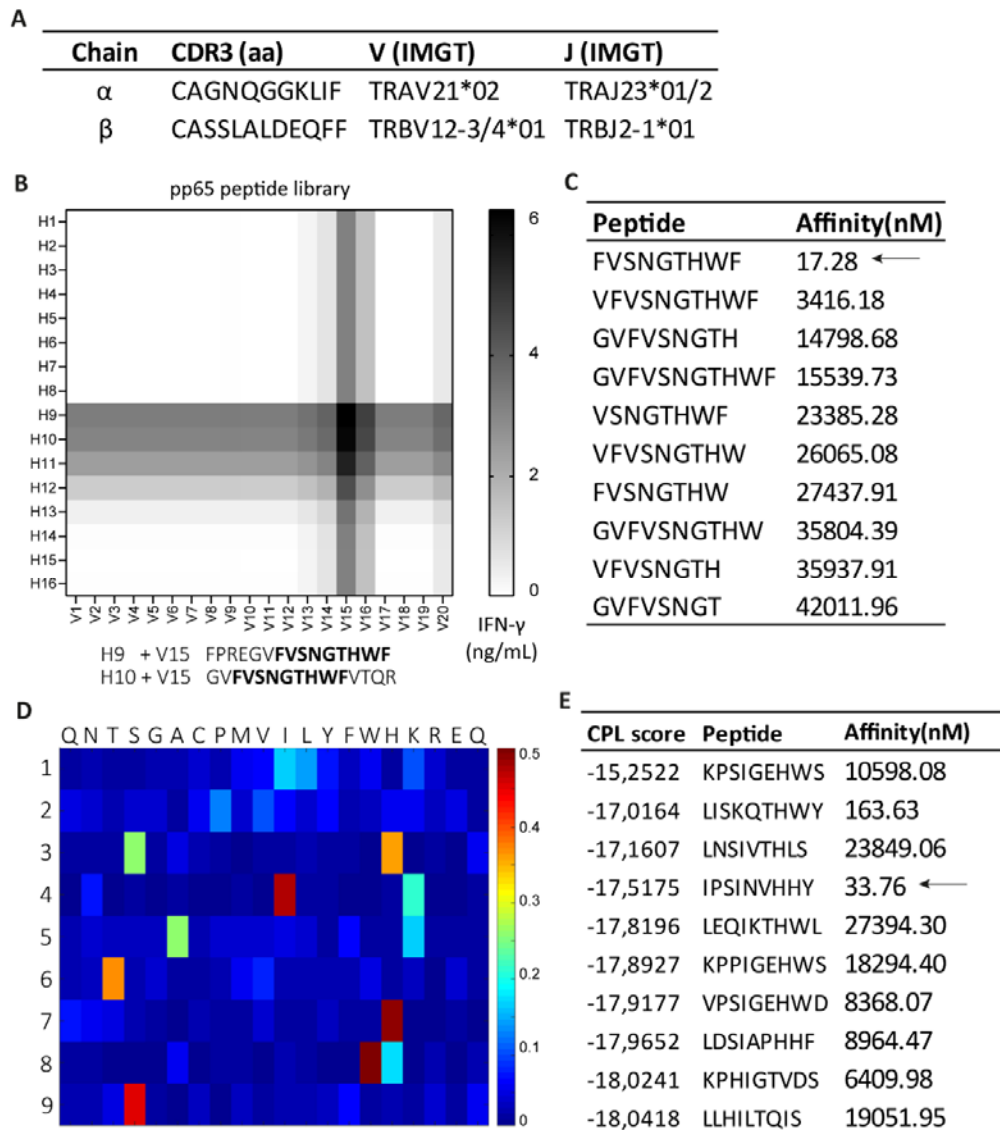

1065

1066 **Figure 2 - figure supplement 3** TCR sequence and peptide identification of 8UTT6 clone

1067 A) Figure showing T cell receptor sequencing result of UTT clones (N=23). B) Heatmap showing  
 1068 reactivity of a representative clone, 8UTT6 clone, against sub pools of SARS-CoV-2 spike  
 1069 peptide library loaded on K562s transduced with HLA-B\*35:01. Reactivity was measured by IFN-  
 1070 γ ELISA. Peptides that induced highest IFN-γ production were depicted under the figure with  
 1071 amino acid overlap between the peptides in black. C) Figure showing NetMHC 4.0-predicted  
 1072 binding to HLA-B\*35:01 of peptides that were recognized in the spike peptide library. The 10  
 1073 peptides with highest binding to HLA-B\*35:01 are shown and strong binders are indicated by an  
 1074 arrow. D) Heatmap demonstrating peptide recognition signature of 8UTT6 clone using the CPL



1075 assay. 8UTT6 clone was co-cultured with peptide-loaded K562 cells transduced HLA-B\*35:01.  
1076 Secreted IFN- $\gamma$  was measured by ELISA and corrected per row. Y-axis shows peptide position  
1077 and x-axis shows the fixed amino acid. E) Figure showing the 10 peptides with highest CPL  
1078 score, their binding affinity to HLA-B\*35:01 and strong binders are indicated by an arrow, as  
1079 predicted by netMHC 4.0.

1080

1081

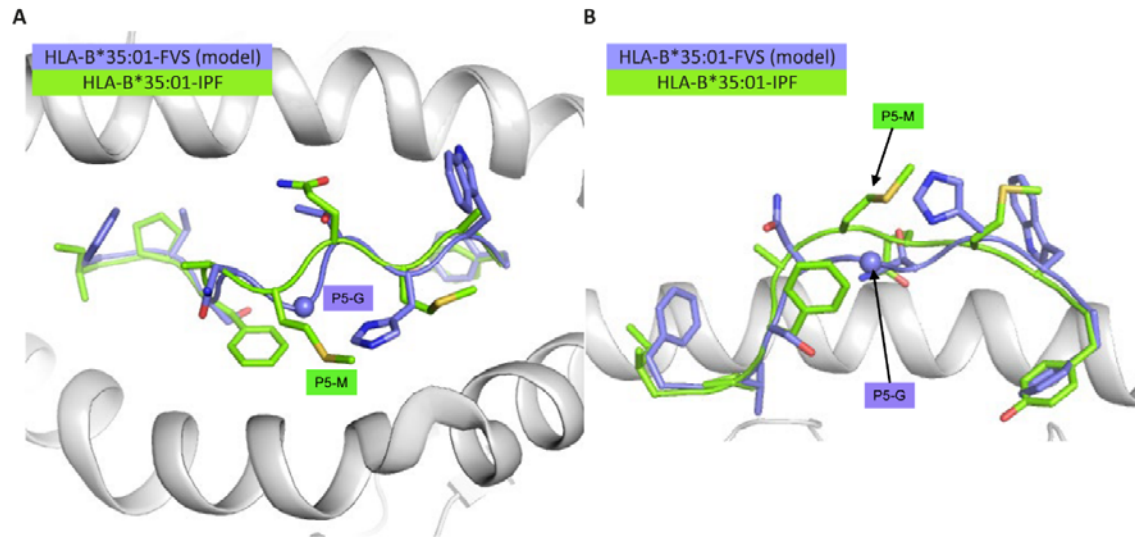

1082

1083 **Figure 3 - figure supplement 1** Structural overlay of HLA-B\*35:01-IPF structure with the model  
1084 of the HLA-B\*35:01-FVS

1085 (A) Top view of the HLA-B\*35:01-IPF (peptide in chartreuse) and HLA-B\*35:01-FVS (peptide in  
1086 blue) aligned on the HLA cleft (white cartoon). B) Side view of the same structural overlay as  
1087 panel A, with the same colour scheme. The sphere represents the C $\alpha$  atom of the FVS peptide  
1088 P5-G residue.

1089

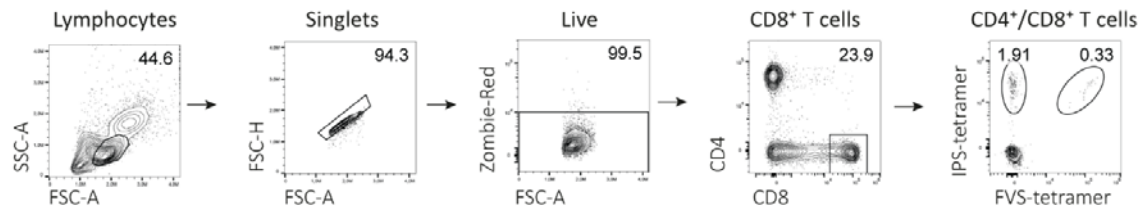

1090

1091 **Figure 4 - figure supplement 1** Flow cytometry gating example for tetramer staining assays

1092 Representative example of flow cytometry gating strategy for tetramer positive CD8<sup>+</sup> T cells. All

1093 events were gated on lymphocytes, single cells, viable cells, CD8 positive and subsequently

1094 separated for binding to tetramer consisting of HLA-B\*35:01 with IPS peptide or FVS peptide.

1095

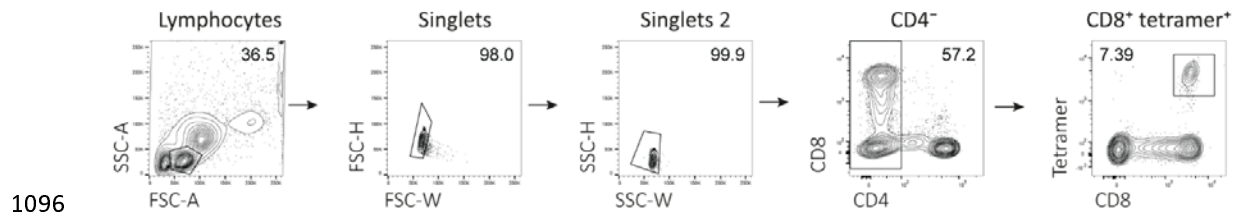

1097 **Figure 5 - figure supplement 1** Flow activated cell sorting gating example

1098 Representative example of fluorescent-activated cell sorting for tetramer positive CD8<sup>+</sup> T cells.

1099 All events were gated on lymphocytes, single cells, CD4<sup>-</sup> and subsequently on CD8<sup>+</sup>tetramer<sup>+</sup>.

1100

1101

**A**

|     | TRAV (IMGT) | TRAJ (IMGT) | CDR3 (aa)  | CDR3 $\alpha$ (nt)                                                |
|-----|-------------|-------------|------------|-------------------------------------------------------------------|
| UTT | TRAV21*02   | TRAJ23*01   | CAGNQGGLIF | T G T G C T G G G A A C C A G G G A G G A A A G C T T A T C T T C |
| UBV | TRAV21*01   | TRAJ23*01   | CAGNQGGLIF | T G T G C T G G A A A C C A G G G A G G A A A G C T T A T C T T C |
| JZX | TRAV21*02   | TRAJ23*01   | CAGNQGGLIF | T G T G C T G G G A A C C A G G G A G G A A A G C T T A T C T T C |
| SFW | TRAV21*02   | TRAJ23*01   | CAGNQGGLIF | T G T G C T G G G A A C C A G G G A G G A A A G C T T A T C T T C |

**B**

|     | TRBV (IMGT)             | TRBJ (IMGT) | CDR3 (aa)    | CDR3 $\beta$ (nt)                                                       |
|-----|-------------------------|-------------|--------------|-------------------------------------------------------------------------|
| UTT | TRBV12-3*01             | TRBJ2-1*01  | CASSLALDEQFF | T G T G C C A G C A G T T T A G C G C T G G A T G A G C A G T T C T T C |
| UBV | TRBV12-3*01             | TRBJ2-1*01  | CASSLALDEQFF | T G T G C C A G C A G T T T A G C G C T G G A T G A G C A G T T C T T C |
| JZX | TRBV12-3*01/TRBV12-4*01 | TRBJ2-1*01  | CASSLALDEQFF | T G T G C C A G C A G T T T A G C G C T C G A T G A G C A G T T C T T C |
| SFW | TRBV12-3*01/TRBV12-4*01 | TRBJ2-1*01  | CASSLALDEQFF | T G T G C C A G C A G T T T A G C G C T T G A T G A G C A G T T C T T C |

1102

1103 **Figure 5 - figure supplement 2** TCR sequencing of B\*35/FVS-sorted samples

1104 Nucleotide alignment of the CDR3  $\alpha$  and  $\beta$  sequence of PBMCs sorted on B\*35/FVS-tetramer  
 1105 binding. Segment numbering is depicted according to the international immunogenetics  
 1106 information system (IMGT) nomenclature. A) Nucleotide alignment of the CDR3 $\alpha$  sequences. B)  
 1107 Nucleotide alignment of the CDR3 $\beta$  sequences.
